# Supplementary material for: A B-cell developmental gene regulatory network is activated in infant AML
Source: PLoS One. 2021 Nov 18;16(11):e0259197. doi: 10.1371/journal.pone.0259197 (PMC8601427; doi:10.1371/journal.pone.0259197)
Supplement: S2 Table — (XLSX) [file pone.0259197.s004.xlsx]

## Sheet: miRs_DE_lt3_gt5_AAML1031
	avLog < 3yrs	avLog > 5 ys	logFC	p	adjP	selected		31 DE miRs (FC>2, adjP<0.01, max>5
hsa-mir-363.MIMAT0000707	7.00272	4.96485	2.03787	2.7091e-49	4.21537e-46	1		hsa-mir-363	MIMAT0000707
hsa-mir-151a.MIMAT0000757	9.60702	7.70373	1.9033	3.76509e-48	2.92924e-45	1		hsa-mir-151a	MIMAT0000757
hsa-mir-501.MIMAT0004774	6.72306	5.19963	1.52342	9.54575e-46	4.95106e-43	1		hsa-mir-501	MIMAT0004774
hsa-mir-342.MIMAT0004694	5.93657	4.76207	1.17449	1.11173e-43	4.32462e-41	1		hsa-mir-342	MIMAT0004694
hsa-mir-342.MIMAT0000753	10.392	9.18735	1.20466	7.91319e-42	2.05215e-39	1		hsa-mir-342	MIMAT0000753
hsa-mir-20b.MIMAT0001413	8.85725	6.78734	2.06991	1.17081e-41	2.60254e-39	1		hsa-mir-20b	MIMAT0001413
hsa-mir-106a.MIMAT0000103	7.02029	5.68853	1.33175	6.61155e-41	1.28595e-38	1		hsa-mir-106a	MIMAT0000103
hsa-mir-151a.MIMAT0004697	6.2703	4.5558	1.71451	9.34535e-41	1.61571e-38	1		hsa-mir-151a	MIMAT0004697
hsa-mir-150.MIMAT0000451	12.71	11.1885	1.52149	8.36458e-38	1.30153e-35	1		hsa-mir-150	MIMAT0000451
hsa-mir-148a.MIMAT0000243	13.5658	12.1706	1.39522	2.86451e-35	3.18369e-33	1		hsa-mir-148a	MIMAT0000243
hsa-mir-598.MIMAT0003266	5.14963	3.61371	1.53592	6.1209e-35	6.34942e-33	1		hsa-mir-598	MIMAT0003266
hsa-mir-500a.MIMAT0002871	9.32403	8.20947	1.11456	1.51162e-33	1.17604e-31	1		hsa-mir-500a	MIMAT0002871
hsa-mir-222.MIMAT0000279	7.92199	9.04509	-1.12309	3.50629e-31	2.27325e-29	1		hsa-mir-222	MIMAT0000279
hsa-mir-30a.MIMAT0000088	6.82881	5.07244	1.75636	1.15863e-30	6.67715e-29	1		hsa-mir-30a	MIMAT0000088
hsa-mir-30a.MIMAT0000087	9.18814	7.49566	1.69248	2.34843e-28	1.01504e-26	1		hsa-mir-30a	MIMAT0000087
hsa-mir-221.MIMAT0000278	9.83404	10.8504	-1.01637	6.8106e-27	2.40848e-25	1		hsa-mir-221	MIMAT0000278
hsa-mir-181c.MIMAT0000258	6.10597	7.20113	-1.09516	7.86723e-27	2.72031e-25	1		hsa-mir-181c	MIMAT0000258
hsa-mir-379.MIMAT0000733	5.92898	3.86205	2.06694	3.47612e-25	1.12684e-23	1		hsa-mir-379	MIMAT0000733
hsa-mir-181d.MIMAT0002821	5.54987	6.71274	-1.16287	6.03885e-25	1.87929e-23	1		hsa-mir-181d	MIMAT0002821
hsa-let-7b.MIMAT0000063	12.7752	13.8859	-1.11072	5.19653e-24	1.47014e-22	1		hsa-let-7b	MIMAT0000063
hsa-mir-181a.MIMAT0000256	13.9905	15.0346	-1.04418	6.50992e-23	1.63378e-21	1		hsa-mir-181a	MIMAT0000256
hsa-mir-134.MIMAT0000447	5.22261	3.26342	1.95919	1.18149e-22	2.87251e-21	1		hsa-mir-134	MIMAT0000447
hsa-mir-542.MIMAT0003389	8.44722	6.86306	1.58416	4.31845e-22	9.46409e-21	1		hsa-mir-542	MIMAT0003389
hsa-mir-181c.MIMAT0004559	6.40722	7.49426	-1.08704	7.8941e-22	1.68263e-20	1		hsa-mir-181c	MIMAT0004559
hsa-mir-144.MIMAT0004600	10.7112	8.98106	1.73013	7.70057e-21	1.3616e-19	1		hsa-mir-144	MIMAT0004600
hsa-mir-486.MIMAT0002177	11.7696	10.1941	1.57551	2.47096e-20	4.17915e-19	1		hsa-mir-486	MIMAT0002177
hsa-mir-450b.MIMAT0004909	5.08333	3.6746	1.40872	2.91197e-19	4.31527e-18	1		hsa-mir-450b	MIMAT0004909
hsa-mir-451a.MIMAT0001631	12.9558	11.4854	1.47034	3.17287e-19	4.65754e-18	1		hsa-mir-451a	MIMAT0001631
hsa-mir-144.MIMAT0000436	5.94318	4.80927	1.13391	1.20156e-13	9.07585e-13	1		hsa-mir-144	MIMAT0000436
hsa-mir-126.MIMAT0000445	10.7064	11.8779	-1.17154	1.27708e-10	7.49862e-10	1		hsa-mir-126	MIMAT0000445
hsa-mir-9.MIMAT0000441	11.13	9.76408	1.3659	2.86459e-10	1.61496e-09	1		hsa-mir-9	MIMAT0000441
hsa-mir-4491.MIMAT0019026	1.28315	0.382797	0.900352	1.17627e-42	3.66056e-40	0
hsa-mir-150.MIMAT0004610	4.17339	2.78149	1.3919	6.18924e-36	8.75496e-34	0
hsa-mir-3074.MIMAT0019208	4.63586	3.63931	0.996549	1.57537e-35	2.04273e-33	0
hsa-mir-151b.MIMAT0010214	1.73652	0.843145	0.893375	1.78347e-35	2.13468e-33	0
hsa-mir-200c.MIMAT0000617	7.69539	6.88806	0.807332	3.31579e-34	3.22461e-32	0
hsa-mir-4662a.MIMAT0019731	4.93162	3.21568	1.71595	4.81407e-34	4.40629e-32	0
hsa-mir-1180.MIMAT0005825	4.67979	3.29741	1.38238	7.48325e-34	6.46886e-32	0
hsa-mir-501.MIMAT0002872	3.5905	2.57943	1.01106	1.38583e-33	1.13492e-31	0
hsa-mir-107.MIMAT0000104	7.09176	6.5227	0.569063	5.61637e-32	4.16146e-30	0
hsa-mir-6507.MIMAT0025471	0.464708	0.0195805	0.445128	1.30837e-31	9.25375e-30	0
hsa-mir-148a.MIMAT0004549	2.74979	1.69765	1.05214	2.5692e-31	1.73812e-29	0
hsa-mir-20b.MIMAT0004752	3.32522	1.8152	1.51002	3.67665e-31	2.28835e-29	0
hsa-mir-18b.MIMAT0001412	1.8076	0.918271	0.889327	4.02931e-31	2.41139e-29	0
hsa-mir-148b.MIMAT0000759	8.02011	7.47476	0.545343	1.40753e-30	7.82182e-29	0
hsa-mir-502.MIMAT0004775	3.88086	2.98399	0.89687	1.52015e-30	8.1024e-29	0
hsa-mir-551a.MIMAT0003214	1.40367	2.59049	-1.18683	1.56216e-30	8.1024e-29	0
hsa-mir-192.MIMAT0000222	10.0005	9.11478	0.885725	5.09834e-30	2.55904e-28	0
hsa-let-7b.MIMAT0004482	2.31905	3.44318	-1.12413	1.53367e-29	7.45748e-28	0
hsa-mir-3682.MIMAT0018110	2.01843	1.39048	0.62795	3.51573e-29	1.65772e-27	0
hsa-mir-185.MIMAT0000455	9.07009	8.36695	0.703139	5.44043e-29	2.48979e-27	0
hsa-mir-767.MIMAT0003882	0.50082	0.040533	0.460287	1.23838e-28	5.50548e-27	0
hsa-mir-532.MIMAT0002888	10.5823	9.68662	0.895657	2.64817e-28	1.11366e-26	0
hsa-mir-3920.MIMAT0018195	0.696474	0.0861959	0.610278	3.14789e-28	1.28898e-26	0
hsa-mir-4746.MIMAT0019880	4.65931	3.97048	0.688834	5.20396e-28	2.07625e-26	0
hsa-mir-194.MIMAT0000460	8.74658	7.78612	0.96046	6.0123e-28	2.33879e-26	0
hsa-mir-18b.MIMAT0004751	1.2824	0.543952	0.738448	6.96928e-28	2.64493e-26	0
hsa-mir-185.MIMAT0004611	4.01492	3.34722	0.667692	1.72274e-27	6.38235e-26	0
hsa-mir-215.MIMAT0000272	2.6381	1.79032	0.847782	5.46639e-27	1.97807e-25	0
hsa-mir-6507.MIMAT0025470	1.17499	0.0716526	1.10334	1.21989e-26	4.12642e-25	0
hsa-mir-106a.MIMAT0004517	1.3837	0.647367	0.736329	1.6514e-25	5.46719e-24	0
hsa-mir-589.MIMAT0004799	7.58411	7.12879	0.455322	3.99641e-25	1.26906e-23	0
hsa-mir-432.MIMAT0002814	2.98597	1.32879	1.65718	1.37736e-24	4.2023e-23	0
hsa-mir-127.MIMAT0000446	4.93854	3.00804	1.9305	2.82471e-24	8.45242e-23	0
hsa-mir-194-2.MIMAT0004671	3.25864	2.30126	0.957386	3.09889e-24	9.09786e-23	0
hsa-mir-889.MIMAT0004921	2.77127	1.20779	1.56349	4.07803e-24	1.17508e-22	0
hsa-mir-652.MIMAT0003322	6.74171	6.22185	0.519866	9.85362e-24	2.7379e-22	0
hsa-mir-105.MIMAT0000102	0.444428	0.0443096	0.400118	1.72643e-23	4.63937e-22	0
hsa-mir-190a.MIMAT0000458	3.00786	1.90533	1.10253	1.74367e-23	4.63937e-22	0
hsa-mir-363.MIMAT0003385	1.02075	0.404864	0.615888	1.75915e-23	4.63937e-22	0
hsa-mir-548b.MIMAT0003254	0.716244	0.248758	0.467486	2.08288e-23	5.40161e-22	0
hsa-mir-296.MIMAT0000690	1.51715	0.697424	0.81973	3.90534e-23	9.96182e-22	0
hsa-mir-22.MIMAT0000077	14.7884	14.1156	0.672873	8.94611e-23	2.20955e-21	0
hsa-mir-192.MIMAT0004543	2.44448	1.73619	0.708287	1.26012e-22	3.01652e-21	0
hsa-mir-409.MIMAT0001639	3.10343	1.55467	1.54876	1.48183e-22	3.49352e-21	0
hsa-mir-877.MIMAT0004949	3.09436	2.28497	0.809398	1.61323e-22	3.74654e-21	0
hsa-mir-486.MIMAT0004762	3.50103	2.19065	1.31038	2.06721e-22	4.73026e-21	0
hsa-mir-369.MIMAT0000721	2.12681	0.929118	1.19769	2.73787e-22	6.17409e-21	0
hsa-mir-410.MIMAT0002171	2.14213	0.869371	1.27276	3.13441e-22	6.96735e-21	0
hsa-mir-433.MIMAT0001627	0.690712	0.173183	0.517529	5.00393e-22	1.08141e-20	0
hsa-mir-494.MIMAT0002816	1.10425	0.374251	0.730002	8.84425e-22	1.85968e-20	0
hsa-mir-376a-1.MIMAT0003386	0.600042	0.140365	0.459676	1.06155e-21	2.20236e-20	0
hsa-mir-1976.MIMAT0009451	5.6407	5.14903	0.491664	1.22408e-21	2.50614e-20	0
hsa-mir-454.MIMAT0003884	2.00931	1.44093	0.568377	1.36591e-21	2.73299e-20	0
hsa-mir-769.MIMAT0003887	1.87112	1.34234	0.528778	1.37001e-21	2.73299e-20	0
hsa-mir-493.MIMAT0002813	2.04819	0.840532	1.20765	1.52214e-21	2.99804e-20	0
hsa-mir-660.MIMAT0003338	7.40606	6.58892	0.81714	3.04327e-21	5.91916e-20	0
hsa-mir-224.MIMAT0000281	4.6948	2.24656	2.44824	3.17063e-21	6.09074e-20	0
hsa-mir-7156.MIMAT0028222	0.365428	0.0151232	0.350305	3.47646e-21	6.5968e-20	0
hsa-mir-370.MIMAT0000722	1.74951	0.61616	1.13335	3.55045e-21	6.65603e-20	0
hsa-mir-382.MIMAT0000737	2.32698	1.0515	1.27548	4.19575e-21	7.6807e-20	0
hsa-mir-431.MIMAT0004757	2.21411	0.852903	1.36121	4.16542e-21	7.6807e-20	0
hsa-mir-454.MIMAT0003885	5.70822	5.2106	0.497625	5.87591e-21	1.05891e-19	0
hsa-mir-618.MIMAT0003287	2.40899	1.28439	1.1246	5.92065e-21	1.05891e-19	0
hsa-mir-133a.MIMAT0000427	2.21939	3.62699	-1.4076	8.97281e-21	1.56873e-19	0
hsa-mir-654.MIMAT0004814	3.82343	2.12936	1.69407	9.86294e-21	1.70519e-19	0
hsa-mir-495.MIMAT0002817	2.12247	0.953024	1.16945	2.37431e-20	4.05982e-19	0
hsa-mir-323a.MIMAT0000755	1.60752	0.525848	1.08168	2.71431e-20	4.54136e-19	0
hsa-mir-4464.MIMAT0018988	0.142025	0.0184329	0.123592	4.69772e-20	7.77622e-19	0
hsa-mir-758.MIMAT0022929	1.42533	0.46974	0.955594	4.81926e-20	7.89343e-19	0
hsa-mir-324.MIMAT0000762	5.53847	4.92926	0.609215	5.54517e-20	8.9878e-19	0
hsa-mir-221.MIMAT0004568	2.65828	3.43288	-0.774601	5.60664e-20	8.99374e-19	0
hsa-mir-103a.MIMAT0000101	16.2454	15.7822	0.463164	6.99095e-20	1.10999e-18	0
hsa-mir-758.MIMAT0003879	2.2571	0.879407	1.37769	8.09275e-20	1.27195e-18	0
hsa-mir-193b.MIMAT0002819	1.89785	1.16637	0.731482	8.33043e-20	1.29195e-18	0
hsa-mir-330.MIMAT0004693	5.56132	5.02786	0.533453	8.38606e-20	1.29195e-18	0
hsa-mir-636.MIMAT0003306	1.46178	0.947056	0.514723	1.47345e-19	2.24773e-18	0
hsa-mir-412.MIMAT0026557	1.37967	0.428601	0.951066	1.66853e-19	2.52062e-18	0
hsa-mir-381.MIMAT0000736	2.69664	1.37717	1.31946	1.99274e-19	2.98145e-18	0
hsa-mir-500a.MIMAT0004773	4.88064	4.06447	0.816168	5.68416e-19	8.2486e-18	0
hsa-mir-500b.MIMAT0016925	4.88049	4.06341	0.817079	5.72525e-19	8.2486e-18	0
hsa-mir-296.MIMAT0004679	0.953417	0.377466	0.57595	8.19427e-19	1.16975e-17	0
hsa-mir-744.MIMAT0004945	6.04627	5.60268	0.443586	8.60226e-19	1.21683e-17	0
hsa-mir-6877.MIMAT0027654	1.38812	0.863511	0.524606	8.99123e-19	1.26039e-17	0
hsa-mir-548j.MIMAT0005875	2.05341	1.48773	0.565683	9.71984e-19	1.35036e-17	0
hsa-mir-380.MIMAT0000734	0.515324	0.124065	0.391259	1.08723e-18	1.48398e-17	0
hsa-mir-93.MIMAT0000093	15.8161	15.4606	0.355549	1.07903e-18	1.48398e-17	0
hsa-mir-487b.MIMAT0003180	1.55808	0.634952	0.923129	1.14349e-18	1.54719e-17	0
hsa-mir-5010.MIMAT0021044	1.44712	0.884109	0.563008	1.91288e-18	2.5659e-17	0
hsa-mir-6755.MIMAT0027410	1.21619	0.798221	0.41797	2.64938e-18	3.52345e-17	0
hsa-mir-4446.MIMAT0018965	0.339273	0.0905183	0.248754	3.15923e-18	4.16589e-17	0
hsa-mir-337.MIMAT0000754	2.54498	1.22969	1.31529	5.53127e-18	7.23249e-17	0
hsa-mir-127.MIMAT0004604	3.1522	1.72939	1.42281	6.12398e-18	7.94076e-17	0
hsa-mir-362.MIMAT0000705	4.50582	3.77689	0.728936	7.29481e-18	9.38077e-17	0
hsa-mir-552.MIMAT0026615	0.439546	0.0961534	0.343393	7.73875e-18	9.87008e-17	0
hsa-mir-874.MIMAT0004911	5.9986	5.20754	0.791062	7.84e-18	9.91792e-17	0
hsa-mir-365b.MIMAT0022834	4.06587	3.17758	0.888284	8.68188e-18	1.08944e-16	0
hsa-mir-365a.MIMAT0000710	4.06565	3.17758	0.888068	8.96842e-18	1.11639e-16	0
hsa-mir-1306.MIMAT0005950	2.44624	1.92966	0.516586	1.06644e-17	1.31696e-16	0
hsa-mir-502.MIMAT0002873	3.28616	2.54798	0.738188	1.21503e-17	1.48866e-16	0
hsa-mir-187.MIMAT0000262	2.04986	1.03725	1.01261	1.2557e-17	1.52646e-16	0
hsa-mir-409.MIMAT0001638	1.53793	0.590319	0.947612	1.46289e-17	1.76454e-16	0
hsa-mir-452.MIMAT0001635	4.02491	1.86691	2.158	2.00748e-17	2.40279e-16	0
hsa-mir-7706.MIMAT0030021	3.3805	2.80393	0.576568	2.1125e-17	2.5092e-16	0
hsa-mir-654.MIMAT0003330	0.731647	0.223881	0.507767	2.2569e-17	2.66041e-16	0
hsa-mir-450a.MIMAT0001545	4.44284	3.18132	1.26151	2.94893e-17	3.45003e-16	0
hsa-mir-376c.MIMAT0000720	1.18292	0.47338	0.709537	3.30753e-17	3.84068e-16	0
hsa-mir-4678.MIMAT0019762	0.740646	0.276108	0.464538	3.59506e-17	4.14364e-16	0
hsa-mir-543.MIMAT0004954	0.689668	0.231258	0.458409	3.96925e-17	4.54129e-16	0
hsa-mir-18a.MIMAT0000072	6.68117	6.17059	0.510582	4.995e-17	5.67315e-16	0
hsa-mir-496.MIMAT0002818	1.31348	0.44734	0.866136	5.58511e-17	6.29742e-16	0
hsa-mir-382.MIMAT0022697	1.03923	0.407956	0.631271	5.63901e-17	6.31244e-16	0
hsa-mir-5586.MIMAT0022287	2.62102	1.50591	1.11512	7.54036e-17	8.38057e-16	0
hsa-mir-369.MIMAT0001621	0.530706	0.161636	0.36907	9.09733e-17	1.00393e-15	0
hsa-mir-3150b.MIMAT0018194	2.96325	2.14693	0.81632	1.08153e-16	1.18511e-15	0
hsa-mir-106b.MIMAT0004672	9.5697	9.24655	0.323147	1.34783e-16	1.4666e-15	0
hsa-mir-4683.MIMAT0019768	0.705435	0.275612	0.429823	1.38991e-16	1.49152e-15	0
hsa-mir-628.MIMAT0004809	4.5381	3.94313	0.594967	1.38602e-16	1.49152e-15	0
hsa-mir-655.MIMAT0003331	0.854589	0.328329	0.52626	1.48652e-16	1.58427e-15	0
hsa-mir-452.MIMAT0001636	1.44306	0.284068	1.159	1.75019e-16	1.85258e-15	0
hsa-mir-4660.MIMAT0019728	1.52327	1.04658	0.47669	2.70395e-16	2.8428e-15	0
hsa-mir-370.MIMAT0026483	1.02251	0.374855	0.647658	2.9775e-16	3.10939e-15	0
hsa-mir-421.MIMAT0003339	3.27511	2.73192	0.54319	3.08078e-16	3.1958e-15	0
hsa-mir-136.MIMAT0000448	2.02017	1.01608	1.00409	3.19472e-16	3.29204e-15	0
hsa-mir-493.MIMAT0003161	1.21083	0.43206	0.778771	3.31614e-16	3.39468e-15	0
hsa-mir-1911.MIMAT0007885	0.339084	0.0702375	0.268846	3.61828e-16	3.65789e-15	0
hsa-mir-7849.MIMAT0030424	0.48022	0.148478	0.331742	3.62028e-16	3.65789e-15	0
hsa-mir-1307.MIMAT0005951	11.7441	11.2445	0.499611	5.24803e-16	5.26834e-15	0
hsa-mir-3677.MIMAT0018101	1.98693	1.43884	0.548092	5.83197e-16	5.81702e-15	0
hsa-mir-3911.MIMAT0018185	0.445648	0.166969	0.27868	6.69683e-16	6.63712e-15	0
hsa-mir-1224.MIMAT0005458	0.861799	0.343915	0.517883	8.03175e-16	7.90974e-15	0
hsa-mir-542.MIMAT0003340	2.36109	1.48752	0.873565	9.17704e-16	8.9808e-15	0
hsa-mir-1296.MIMAT0005794	2.87491	2.1112	0.763714	9.76861e-16	9.49997e-15	0
hsa-mir-92b.MIMAT0003218	5.76638	5.01691	0.749465	1.22485e-15	1.18377e-14	0
hsa-mir-539.MIMAT0003163	1.95605	0.865194	1.09085	1.28849e-15	1.23758e-14	0
hsa-mir-377.MIMAT0004689	0.568563	0.186828	0.381735	1.36651e-15	1.30447e-14	0
hsa-mir-541.MIMAT0004920	0.416772	0.0880295	0.328742	1.99149e-15	1.88948e-14	0
hsa-mir-1295a.MIMAT0005885	0.333486	0.106655	0.226831	2.04288e-15	1.9265e-14	0
hsa-mir-411.MIMAT0004813	0.558189	0.172937	0.385252	2.07573e-15	1.94568e-14	0
hsa-mir-224.MIMAT0009198	1.16616	0.21332	0.952839	2.15404e-15	2.007e-14	0
hsa-mir-154.MIMAT0000453	0.679993	0.222795	0.457198	3.18014e-15	2.92799e-14	0
hsa-mir-7.MIMAT0000252	3.3602	2.67575	0.684442	3.1794e-15	2.92799e-14	0
hsa-mir-7151.MIMAT0028212	0.237458	0.0256956	0.211763	3.24694e-15	2.97191e-14	0
hsa-mir-301a.MIMAT0000688	5.58204	4.96777	0.614266	4.16475e-15	3.78968e-14	0
hsa-mir-154.MIMAT0000452	1.05659	0.440667	0.61592	4.22731e-15	3.82424e-14	0
hsa-mir-485.MIMAT0002176	1.22767	0.511292	0.716376	4.28786e-15	3.85659e-14	0
hsa-mir-487a.MIMAT0002178	0.271412	0.0566727	0.21474	4.46175e-15	3.98993e-14	0
hsa-mir-138.MIMAT0000430	0.602334	0.233589	0.368745	5.22853e-15	4.64891e-14	0
hsa-mir-7151.MIMAT0028213	0.18989	0.0204015	0.169488	5.30833e-15	4.69305e-14	0
hsa-mir-1226.MIMAT0005577	2.2561	1.74963	0.506471	9.1969e-15	8.08496e-14	0
hsa-mir-301a.MIMAT0022696	3.60957	2.94236	0.667207	1.08537e-14	9.43482e-14	0
hsa-mir-656.MIMAT0003332	0.397484	0.137931	0.259553	1.08365e-14	9.43482e-14	0
hsa-mir-25.MIMAT0000081	15.2441	14.8409	0.403261	1.12093e-14	9.63628e-14	0
hsa-mir-380.MIMAT0000735	0.381179	0.0870126	0.294166	1.11829e-14	9.63628e-14	0
hsa-mir-6731.MIMAT0027363	0.826901	0.454974	0.371926	1.21244e-14	1.03657e-13	0
hsa-mir-376b.MIMAT0002172	0.565552	0.19007	0.375482	1.32952e-14	1.12431e-13	0
hsa-mir-487a.MIMAT0026559	0.520341	0.157442	0.362899	1.32631e-14	1.12431e-13	0
hsa-mir-411.MIMAT0003329	0.996569	0.40081	0.595759	1.49427e-14	1.2568e-13	0
hsa-mir-30c-2.MIMAT0004550	1.22756	0.474636	0.752923	1.68963e-14	1.41347e-13	0
hsa-mir-1288.MIMAT0005942	0.9017	0.570184	0.331515	2.28165e-14	1.89852e-13	0
hsa-mir-539.MIMAT0022705	0.477566	0.152221	0.325345	2.3106e-14	1.91239e-13	0
hsa-mir-222.MIMAT0004569	5.06536	5.89052	-0.825158	2.41448e-14	1.9878e-13	0
hsa-mir-1262.MIMAT0005914	0.300663	0.0979975	0.202666	2.89483e-14	2.36361e-13	0
hsa-mir-500b.MIMAT0027032	1.73531	1.22429	0.511018	2.90135e-14	2.36361e-13	0
hsa-mir-4732.MIMAT0019856	2.49763	1.55728	0.94034	3.15335e-14	2.55553e-13	0
hsa-mir-4654.MIMAT0019720	0.172615	0.0152465	0.157368	3.19415e-14	2.57518e-13	0
hsa-mir-193a.MIMAT0004614	6.64204	5.76877	0.873273	4.07202e-14	3.26601e-13	0
hsa-mir-3691.MIMAT0018120	1.26103	0.87371	0.387318	4.42914e-14	3.53422e-13	0
hsa-mir-379.MIMAT0004690	0.652467	0.203927	0.44854	4.5268e-14	3.59372e-13	0
hsa-mir-323b.MIMAT0015050	1.89566	0.814332	1.08133	4.60847e-14	3.63999e-13	0
hsa-mir-329.MIMAT0001629	0.588674	0.174902	0.413772	4.87688e-14	3.83254e-13	0
hsa-mir-136.MIMAT0004606	1.4529	0.658067	0.794836	6.45337e-14	5.04595e-13	0
hsa-mir-431.MIMAT0001625	0.892082	0.283765	0.608317	7.48573e-14	5.8239e-13	0
hsa-let-7d.MIMAT0004484	9.76624	10.3964	-0.6302	8.59643e-14	6.63547e-13	0
hsa-mir-1266.MIMAT0005920	1.18557	1.93135	-0.745784	8.61417e-14	6.63547e-13	0
hsa-mir-607.MIMAT0003275	1.01848	0.53336	0.485116	9.53562e-14	7.30907e-13	0
hsa-mir-939.MIMAT0004982	1.60195	1.17337	0.428579	1.08994e-13	8.31349e-13	0
hsa-mir-3914.MIMAT0018188	0.128603	0.019252	0.109351	1.19907e-13	9.07585e-13	0
hsa-mir-135b.MIMAT0000758	0.464443	0.191512	0.272931	1.25629e-13	9.44343e-13	0
hsa-let-7a.MIMAT0000062	15.5934	15.9978	-0.404315	1.7136e-13	1.2819e-12	0
hsa-mir-3934.MIMAT0018349	0.741141	0.376488	0.364653	2.00224e-13	1.48356e-12	0
hsa-mir-873.MIMAT0022717	0.327344	0.0522372	0.275107	1.99883e-13	1.48356e-12	0
hsa-mir-581.MIMAT0003246	1.78322	1.1522	0.631029	2.52208e-13	1.85989e-12	0
hsa-mir-200b.MIMAT0000318	3.5541	2.9547	0.599401	2.65534e-13	1.94892e-12	0
hsa-mir-6810.MIMAT0027521	0.697167	1.08325	-0.38608	3.20793e-13	2.34344e-12	0
hsa-mir-1287.MIMAT0005878	4.64972	4.12947	0.520242	3.30197e-13	2.40087e-12	0
hsa-mir-6783.MIMAT0027467	1.14224	0.762069	0.380169	4.38098e-13	3.17061e-12	0
hsa-mir-629.MIMAT0004810	8.77632	8.39893	0.377394	5.20766e-13	3.75144e-12	0
hsa-mir-503.MIMAT0022925	1.91549	1.16854	0.746953	5.46963e-13	3.922e-12	0
hsa-mir-22.MIMAT0004495	3.60572	3.07846	0.52726	6.28925e-13	4.48902e-12	0
hsa-mir-3200.MIMAT0015085	1.85347	1.22703	0.626436	7.5609e-13	5.37204e-12	0
hsa-mir-1915.MIMAT0007891	0.49332	0.13789	0.35543	8.64165e-13	6.08937e-12	0
hsa-mir-6806.MIMAT0027513	1.52638	1.13036	0.39602	8.64879e-13	6.08937e-12	0
hsa-mir-362.MIMAT0004683	2.52473	1.95495	0.56978	8.83952e-13	6.19563e-12	0
hsa-mir-299.MIMAT0002890	1.072	0.440464	0.631541	9.18412e-13	6.40829e-12	0
hsa-mir-532.MIMAT0004780	6.21343	5.49796	0.715465	1.11359e-12	7.7355e-12	0
hsa-mir-28.MIMAT0004502	12.1808	11.8724	0.308403	1.29451e-12	8.95227e-12	0
hsa-mir-5584.MIMAT0022283	1.54553	2.22542	-0.679885	1.3698e-12	9.43104e-12	0
hsa-mir-376c.MIMAT0022861	0.307693	0.0887292	0.218964	1.60617e-12	1.10097e-11	0
hsa-mir-200a.MIMAT0001620	1.87191	1.35753	0.514379	1.82303e-12	1.24414e-11	0
hsa-mir-133b.MIMAT0000770	0.298403	0.783792	-0.485389	1.88423e-12	1.28029e-11	0
hsa-mir-181a-1.MIMAT0000270	10.9491	11.7767	-0.827669	1.90065e-12	1.28583e-11	0
hsa-mir-204.MIMAT0000265	0.546975	0.137698	0.409278	2.89687e-12	1.95131e-11	0
hsa-mir-4476.MIMAT0019003	0.114788	0.0192981	0.0954904	3.06717e-12	2.05712e-11	0
hsa-mir-92a-2.MIMAT0004508	0.222987	0.0732433	0.149744	3.65258e-12	2.43924e-11	0
hsa-mir-7854.MIMAT0030429	0.965335	0.58952	0.375815	4.15916e-12	2.76566e-11	0
hsa-mir-5001.MIMAT0021022	1.24488	0.862608	0.382273	4.84784e-12	3.20989e-11	0
hsa-mir-376b.MIMAT0022923	0.271747	0.0816223	0.190125	5.4134e-12	3.56918e-11	0
hsa-mir-577.MIMAT0003242	3.34662	2.30808	1.03855	6.74476e-12	4.42821e-11	0
hsa-mir-4732.MIMAT0019855	1.38957	0.74458	0.644985	6.95348e-12	4.54606e-11	0
hsa-mir-329.MIMAT0026555	0.125411	0.0217435	0.103668	7.17318e-12	4.67007e-11	0
hsa-mir-6852.MIMAT0027604	1.40389	0.957043	0.44685	7.96873e-12	5.16639e-11	0
hsa-mir-485.MIMAT0002175	0.329625	0.111637	0.217988	8.59019e-12	5.5462e-11	0
hsa-mir-4777.MIMAT0019935	1.47319	1.0635	0.409683	8.89543e-12	5.71954e-11	0
hsa-mir-5195.MIMAT0021127	0.0469962	0.000978239	0.046018	1.12439e-11	7.19979e-11	0
hsa-mir-4665.MIMAT0019739	1.07335	0.648045	0.425309	1.14999e-11	7.33354e-11	0
hsa-mir-552.MIMAT0003215	0.129933	0.0277312	0.102202	1.66157e-11	1.05526e-10	0
hsa-mir-128-1.MIMAT0026477	3.64159	3.28787	0.353716	1.8205e-11	1.1515e-10	0
hsa-mir-377.MIMAT0000730	0.384522	0.134569	0.249954	2.12753e-11	1.34026e-10	0
hsa-mir-210.MIMAT0000267	7.26553	6.60519	0.660337	2.28071e-11	1.43096e-10	0
hsa-mir-193b.MIMAT0004767	0.873584	0.471342	0.402242	2.50128e-11	1.56305e-10	0
hsa-mir-548y.MIMAT0018354	0.2076	0.0894137	0.118186	2.99589e-11	1.86464e-10	0
hsa-mir-6762.MIMAT0027425	0.191384	0.0702013	0.121182	3.52238e-11	2.18359e-10	0
hsa-mir-4724.MIMAT0019841	0.720242	0.336928	0.383314	3.56149e-11	2.19908e-10	0
hsa-mir-590.MIMAT0004801	4.11518	3.75628	0.358908	3.66914e-11	2.25659e-10	0
hsa-mir-374a.MIMAT0000727	6.88728	6.50492	0.382355	4.48797e-11	2.74932e-10	0
hsa-mir-141.MIMAT0004598	3.63988	3.15897	0.480911	4.63847e-11	2.83038e-10	0
hsa-mir-424.MIMAT0004749	2.94868	2.14236	0.806319	4.76075e-11	2.89364e-10	0
hsa-mir-1298.MIMAT0026641	0.135187	0.0152903	0.119897	4.79712e-11	2.9044e-10	0
hsa-mir-181b.MIMAT0000257	11.6569	12.308	-0.651112	4.93087e-11	2.97381e-10	0
hsa-mir-1306.MIMAT0022726	4.34003	3.90513	0.434897	6.933e-11	4.16515e-10	0
hsa-mir-4326.MIMAT0016888	4.56143	3.98668	0.574753	7.97606e-11	4.77336e-10	0
hsa-mir-466.MIMAT0015002	0.209656	0.589117	-0.379461	9.55139e-11	5.69424e-10	0
hsa-mir-429.MIMAT0001536	1.47986	0.963573	0.516285	1.13085e-10	6.71602e-10	0
hsa-mir-3151.MIMAT0015024	0.132437	0.374899	-0.242461	1.16887e-10	6.91544e-10	0
hsa-mir-6837.MIMAT0027577	1.79296	1.39881	0.394147	1.24686e-10	7.34889e-10	0
hsa-mir-95.MIMAT0000094	0.588595	0.331351	0.257244	1.30927e-10	7.65876e-10	0
hsa-mir-503.MIMAT0002874	3.9305	2.95244	0.978055	1.36995e-10	7.9837e-10	0
hsa-mir-376a.MIMAT0000729	0.477425	0.179076	0.298349	1.45187e-10	8.42952e-10	0
hsa-mir-875.MIMAT0004922	0.119062	0.0350971	0.0839645	1.64448e-10	9.5123e-10	0
hsa-mir-873.MIMAT0004953	0.458813	0.106507	0.352306	2.2511e-10	1.2973e-09	0
hsa-mir-5189.MIMAT0027088	0.251415	0.093197	0.158218	2.26574e-10	1.30092e-09	0
hsa-mir-1197.MIMAT0005955	0.101281	0.012751	0.0885295	2.3733e-10	1.35766e-09	0
hsa-mir-323a.MIMAT0004696	0.121503	0.017604	0.103899	2.38737e-10	1.36071e-09	0
hsa-mir-6815.MIMAT0027530	0.176003	0.0516613	0.124342	2.61656e-10	1.4859e-09	0
hsa-mir-874.MIMAT0026718	1.56196	1.14885	0.413113	2.83948e-10	1.60663e-09	0
hsa-mir-208a.MIMAT0026474	0.129866	0.00523628	0.124629	3.5394e-10	1.9882e-09	0
hsa-mir-760.MIMAT0004957	1.54472	1.12403	0.420695	4.09388e-10	2.2914e-09	0
hsa-mir-3191.MIMAT0015075	0.418705	0.217746	0.200959	6.23578e-10	3.47773e-09	0
hsa-mir-4742.MIMAT0019873	1.61987	1.23984	0.380033	6.71156e-10	3.72971e-09	0
hsa-mir-126.MIMAT0000444	6.92606	7.90588	-0.979816	7.36048e-10	4.07577e-09	0
hsa-mir-4657.MIMAT0019724	0.38897	0.209669	0.1793	8.32221e-10	4.59197e-09	0
hsa-mir-23b.MIMAT0000418	7.60761	7.30914	0.298465	8.79423e-10	4.83527e-09	0
hsa-mir-770.MIMAT0003948	0.112256	0.0151394	0.0971169	1.12649e-09	6.17191e-09	0
hsa-mir-944.MIMAT0004987	2.25274	1.38496	0.867788	1.16075e-09	6.33727e-09	0
hsa-mir-1301.MIMAT0005797	4.6976	4.31184	0.385761	1.36869e-09	7.44643e-09	0
hsa-mir-182.MIMAT0000259	11.8006	10.8422	0.958344	1.50906e-09	8.18153e-09	0
hsa-mir-625.MIMAT0004808	9.06835	8.67441	0.393938	1.56104e-09	8.43397e-09	0
hsa-mir-138-1.MIMAT0004607	0.130921	0.0273554	0.103565	1.93355e-09	1.04104e-08	0
hsa-mir-3614.MIMAT0017992	2.37984	1.81104	0.5688	2.00777e-09	1.07727e-08	0
hsa-mir-15b.MIMAT0004586	8.02573	7.5914	0.434329	2.18856e-09	1.17024e-08	0
hsa-mir-106b.MIMAT0000680	9.6184	9.33929	0.279106	2.37116e-09	1.26353e-08	0
hsa-mir-30d.MIMAT0000245	13.563	13.8509	-0.287964	2.54356e-09	1.35078e-08	0
hsa-mir-3615.MIMAT0017994	5.31473	4.95696	0.357772	2.76164e-09	1.4616e-08	0
hsa-mir-556.MIMAT0004793	0.733423	0.274748	0.458675	3.36578e-09	1.77531e-08	0
hsa-mir-28.MIMAT0000085	6.51239	6.23526	0.277128	3.54807e-09	1.86513e-08	0
hsa-mir-6777.MIMAT0027454	0.492453	0.266956	0.225498	4.29393e-09	2.24962e-08	0
hsa-mir-130b.MIMAT0000691	5.56897	5.1795	0.389471	4.46404e-09	2.33089e-08	0
hsa-mir-6511b.MIMAT0025848	2.24718	1.90157	0.345614	4.57707e-09	2.38191e-08	0
hsa-mir-3157.MIMAT0015031	0.792412	0.546649	0.245762	4.71734e-09	2.44673e-08	0
hsa-mir-495.MIMAT0022924	0.192633	0.0517812	0.140852	4.87119e-09	2.50979e-08	0
hsa-mir-940.MIMAT0004983	1.85901	1.38271	0.476295	4.85751e-09	2.50979e-08	0
hsa-mir-2277.MIMAT0017352	1.59847	1.28975	0.308717	5.44828e-09	2.79786e-08	0
hsa-mir-30b.MIMAT0000420	9.58614	10.0157	-0.429605	5.9734e-09	3.05744e-08	0
hsa-mir-134.MIMAT0026481	0.242003	0.0843634	0.15764	6.99433e-09	3.56825e-08	0
hsa-mir-545.MIMAT0004785	1.11986	0.802018	0.317846	7.46158e-09	3.79419e-08	0
hsa-mir-381.MIMAT0022862	0.393769	0.144698	0.249071	7.54728e-09	3.81285e-08	0
hsa-mir-624.MIMAT0003293	3.33252	2.99855	0.333968	7.52704e-09	3.81285e-08	0
hsa-mir-484.MIMAT0002174	8.12151	7.79507	0.326444	7.76316e-09	3.90922e-08	0
hsa-mir-6842.MIMAT0027587	3.91475	3.62574	0.289005	7.81864e-09	3.92445e-08	0
hsa-mir-424.MIMAT0001341	7.43978	6.494	0.945778	8.91382e-09	4.45978e-08	0
hsa-mir-6716.MIMAT0025845	0.156691	0.0393476	0.117343	9.29217e-09	4.63417e-08	0
hsa-mir-4433b.MIMAT0030413	1.43731	0.844617	0.592694	1.05076e-08	5.2236e-08	0
hsa-mir-183.MIMAT0000261	9.32839	8.46429	0.864098	1.07987e-08	5.35121e-08	0
hsa-mir-4658.MIMAT0019725	0.202521	0.0785897	0.123932	1.09155e-08	5.39193e-08	0
hsa-mir-4745.MIMAT0019879	0.426586	0.237433	0.189153	1.09727e-08	5.40302e-08	0
hsa-mir-199b.MIMAT0000263	8.18498	8.796	-0.61102	1.10383e-08	5.41819e-08	0
hsa-mir-299.MIMAT0000687	0.287255	0.0903529	0.196902	1.11606e-08	5.46098e-08	0
hsa-mir-4494.MIMAT0019029	0.154603	0.0454325	0.109171	1.13781e-08	5.54994e-08	0
hsa-mir-625.MIMAT0003294	3.28343	2.93117	0.352261	1.17701e-08	5.72322e-08	0
hsa-mir-186.MIMAT0000456	9.57399	9.33769	0.236302	1.32431e-08	6.4194e-08	0
hsa-mir-4685.MIMAT0019772	0.835424	0.58271	0.252714	1.43442e-08	6.93152e-08	0
hsa-mir-1185-1.MIMAT0022838	0.128036	0.0271804	0.100856	1.64945e-08	7.94597e-08	0
hsa-mir-30d.MIMAT0004551	3.16218	3.49071	-0.328522	1.69274e-08	8.12932e-08	0
hsa-mir-140.MIMAT0004597	12.3113	12.1045	0.206762	1.72584e-08	8.26277e-08	0
hsa-mir-3662.MIMAT0018083	1.65142	1.13188	0.519536	1.78013e-08	8.49659e-08	0
hsa-mir-4802.MIMAT0019982	0.235946	0.108368	0.127578	2.00234e-08	9.52794e-08	0
hsa-mir-191.MIMAT0001618	3.97252	3.45986	0.512665	2.02939e-08	9.62722e-08	0
hsa-mir-188.MIMAT0000457	1.59847	1.18111	0.417365	2.05797e-08	9.70362e-08	0
hsa-mir-200a.MIMAT0000682	2.4227	1.93815	0.484554	2.05535e-08	9.70362e-08	0
hsa-mir-1294.MIMAT0005884	0.983017	0.6519	0.331117	2.06744e-08	9.71882e-08	0
hsa-mir-1468.MIMAT0006789	3.51451	3.99698	-0.482469	2.12213e-08	9.94591e-08	0
hsa-mir-320d.MIMAT0006764	0.45334	0.700481	-0.247141	2.13256e-08	9.96476e-08	0
hsa-mir-556.MIMAT0003220	0.544921	0.203281	0.34164	2.15645e-08	1.00462e-07	0
hsa-mir-103a-2.MIMAT0009196	3.22361	2.81421	0.409398	2.2599e-08	1.04968e-07	0
hsa-mir-218.MIMAT0000275	1.67682	1.07078	0.606047	2.31084e-08	1.07014e-07	0
hsa-mir-96.MIMAT0000095	2.23549	1.68404	0.551449	2.53581e-08	1.17084e-07	0
hsa-mir-3944.MIMAT0018360	0.990885	0.702413	0.288472	2.56902e-08	1.18266e-07	0
hsa-mir-3120.MIMAT0019198	0.114948	0.0255015	0.0894464	2.58953e-08	1.18858e-07	0
hsa-mir-27a.MIMAT0004501	5.49212	6.05743	-0.565311	3.44358e-08	1.57594e-07	0
hsa-mir-5187.MIMAT0021117	1.61663	1.3368	0.279831	3.53509e-08	1.61308e-07	0
hsa-mir-29c.MIMAT0004673	5.09674	5.5231	-0.426362	3.67532e-08	1.67216e-07	0
hsa-mir-6501.MIMAT0025458	0.721068	0.499741	0.221327	3.72777e-08	1.69108e-07	0
hsa-mir-505.MIMAT0004776	4.61293	4.25609	0.356839	4.17872e-08	1.89014e-07	0
hsa-mir-942.MIMAT0004985	6.10337	5.84212	0.261252	4.7203e-08	2.12893e-07	0
hsa-mir-2110.MIMAT0010133	3.31766	2.9363	0.381363	5.54907e-08	2.49548e-07	0
hsa-mir-7152.MIMAT0028214	0.234912	0.123027	0.111885	5.99496e-08	2.68823e-07	0
hsa-mir-1.MIMAT0000416	1.8404	2.97279	-1.13239	6.4359e-08	2.86941e-07	0
hsa-mir-629.MIMAT0003298	3.69589	3.32421	0.371686	6.43169e-08	2.86941e-07	0
hsa-mir-361.MIMAT0004682	8.9578	8.72637	0.231438	6.6111e-08	2.93911e-07	0
hsa-mir-320c.MIMAT0005793	1.51239	1.83098	-0.318581	6.69475e-08	2.96781e-07	0
hsa-mir-1229.MIMAT0005584	1.14858	0.828937	0.31964	7.17641e-08	3.1723e-07	0
hsa-mir-7850.MIMAT0030425	1.22678	0.878415	0.348369	7.24693e-08	3.1944e-07	0
hsa-mir-3688.MIMAT0018116	0.632266	0.388635	0.243632	7.44423e-08	3.2721e-07	0
hsa-mir-7702.MIMAT0030017	0.520832	0.224221	0.296611	7.85863e-08	3.44451e-07	0
hsa-mir-18a.MIMAT0002891	4.03129	3.67097	0.360328	7.95051e-08	3.46588e-07	0
hsa-mir-6509.MIMAT0025474	1.86957	1.57582	0.293753	7.95192e-08	3.46588e-07	0
hsa-let-7a.MIMAT0004481	6.01846	6.43999	-0.421532	8.3598e-08	3.63348e-07	0
hsa-mir-642a.MIMAT0003312	2.56027	1.94477	0.615506	8.40756e-08	3.64405e-07	0
hsa-mir-6891.MIMAT0027682	0.84989	0.545594	0.304296	8.60813e-08	3.72063e-07	0
hsa-mir-148b.MIMAT0004699	3.4559	3.11633	0.339568	8.95926e-08	3.86166e-07	0
hsa-mir-3680.MIMAT0018107	1.42665	1.14748	0.279168	9.73891e-08	4.18612e-07	0
hsa-mir-208a.MIMAT0000241	0.0564093	0.00257751	0.0538317	1.08813e-07	4.66426e-07	0
hsa-mir-664b.MIMAT0022272	3.89193	4.51569	-0.62376	1.17154e-07	5.008e-07	0
hsa-mir-605.MIMAT0003273	0.14653	0.0374467	0.109083	1.2961e-07	5.52529e-07	0
hsa-mir-3928.MIMAT0018205	2.13505	1.80014	0.33491	1.31775e-07	5.60225e-07	0
hsa-mir-3940.MIMAT0018356	1.38576	1.03995	0.345804	1.40591e-07	5.94455e-07	0
hsa-mir-4664.MIMAT0019738	0.284341	0.153124	0.131217	1.40489e-07	5.94455e-07	0
hsa-mir-802.MIMAT0004185	0.10651	0.0283121	0.0781979	1.42172e-07	5.99512e-07	0
hsa-mir-450a-1.MIMAT0022700	0.403512	0.209171	0.194341	1.47272e-07	6.19339e-07	0
hsa-mir-1292.MIMAT0005943	1.93612	1.66888	0.267244	1.65536e-07	6.93161e-07	0
hsa-mir-589.MIMAT0003256	3.93748	3.5994	0.33808	1.65717e-07	6.93161e-07	0
hsa-mir-6514.MIMAT0025484	1.00788	0.755531	0.252353	1.67424e-07	6.98422e-07	0
hsa-mir-4772.MIMAT0019927	5.39817	4.79876	0.59941	1.71063e-07	7.09795e-07	0
hsa-mir-5682.MIMAT0022470	0.141142	0.0326895	0.108453	1.70861e-07	7.09795e-07	0
hsa-mir-199a.MIMAT0000232	8.70646	9.1302	-0.423738	1.7168e-07	7.10463e-07	0
hsa-mir-141.MIMAT0000432	4.52051	4.01386	0.506652	1.80682e-07	7.45733e-07	0
hsa-mir-4714.MIMAT0019823	0.471307	0.280295	0.191012	1.84477e-07	7.59383e-07	0
hsa-mir-4484.MIMAT0019018	0.198235	0.087826	0.110409	1.85818e-07	7.62882e-07	0
hsa-mir-200c.MIMAT0004657	1.52845	1.13463	0.393819	1.97362e-07	8.08145e-07	0
hsa-mir-27b.MIMAT0004588	2.54601	2.22849	0.317518	1.98603e-07	8.11092e-07	0
hsa-mir-375.MIMAT0000728	2.61647	2.09755	0.518921	2.09184e-07	8.52071e-07	0
hsa-mir-3117.MIMAT0014979	0.199012	0.0672228	0.131789	2.163e-07	8.78754e-07	0
hsa-mir-3140.MIMAT0015008	0.728135	0.514061	0.214074	2.17828e-07	8.82657e-07	0
hsa-mir-4521.MIMAT0019058	2.5874	2.0998	0.487603	2.26395e-07	9.14989e-07	0
hsa-mir-6734.MIMAT0027369	1.10993	0.869376	0.240558	2.3082e-07	9.30454e-07	0
hsa-mir-152.MIMAT0000438	4.7358	4.2915	0.444303	2.46844e-07	9.92478e-07	0
hsa-mir-19b-1.MIMAT0004491	5.53992	5.93663	-0.396713	2.9939e-07	1.19756e-06	0
hsa-mir-4511.MIMAT0019048	0.530412	0.333433	0.196979	2.99353e-07	1.19756e-06	0
hsa-mir-1284.MIMAT0005941	2.09977	1.71691	0.382859	3.05593e-07	1.21924e-06	0
hsa-mir-378c.MIMAT0016847	3.78352	4.15362	-0.370099	3.09065e-07	1.22994e-06	0
hsa-mir-3934.MIMAT0022975	0.56104	0.339752	0.221288	3.16374e-07	1.25581e-06	0
hsa-mir-490.MIMAT0002806	0.442478	0.176384	0.266093	3.31768e-07	1.31356e-06	0
hsa-mir-188.MIMAT0004613	0.875604	0.586403	0.289202	3.89243e-07	1.53721e-06	0
hsa-mir-1228.MIMAT0005583	0.299116	0.160372	0.138744	4.2261e-07	1.66476e-06	0
hsa-mir-15a.MIMAT0000068	10.6672	10.5337	0.133438	4.24873e-07	1.66945e-06	0
hsa-mir-199b.MIMAT0004563	8.64845	9.06007	-0.411622	4.46459e-07	1.74985e-06	0
hsa-mir-202.MIMAT0002810	1.27044	0.636522	0.633922	4.55359e-07	1.78025e-06	0
hsa-mir-4735.MIMAT0019860	0.0494137	0.00693354	0.0424802	4.66164e-07	1.81792e-06	0
hsa-mir-937.MIMAT0004980	0.95852	0.689422	0.269099	5.1202e-07	1.99176e-06	0
hsa-mir-671.MIMAT0003880	3.7766	3.47329	0.303311	5.13817e-07	1.99377e-06	0
hsa-mir-4745.MIMAT0019878	0.374753	0.196362	0.178391	5.8711e-07	2.27249e-06	0
hsa-mir-371b.MIMAT0019892	0.497823	0.309712	0.188112	5.94277e-07	2.29453e-06	0
hsa-mir-769.MIMAT0003886	4.9662	4.74783	0.218372	6.18882e-07	2.38361e-06	0
hsa-mir-3200.MIMAT0017392	0.126723	0.0350694	0.0916538	6.55622e-07	2.51888e-06	0
hsa-mir-9.MIMAT0000442	2.54316	1.73877	0.80439	6.68863e-07	2.56343e-06	0
hsa-mir-665.MIMAT0004952	0.0796905	0.0180469	0.0616436	7.14166e-07	2.73033e-06	0
hsa-mir-3170.MIMAT0015045	0.0776684	0.0121152	0.0655532	7.93659e-07	3.0268e-06	0
hsa-mir-181b-1.MIMAT0022692	5.86271	6.48426	-0.621556	8.07602e-07	3.07244e-06	0
hsa-mir-3064.MIMAT0019865	0.989269	0.778489	0.210779	1.00082e-06	3.79822e-06	0
hsa-mir-660.MIMAT0022711	0.96503	0.689883	0.275147	1.0183e-06	3.85518e-06	0
hsa-mir-4515.MIMAT0019052	0.191843	0.0842674	0.107575	1.07645e-06	4.06542e-06	0
hsa-mir-877.MIMAT0004950	0.323839	0.183439	0.1404	1.08234e-06	4.07777e-06	0
hsa-mir-4669.MIMAT0019749	0.201967	0.0964746	0.105493	1.12427e-06	4.2255e-06	0
hsa-mir-935.MIMAT0004978	1.01408	0.683138	0.330937	1.16818e-06	4.37997e-06	0
hsa-mir-1298.MIMAT0005800	0.168573	0.0339995	0.134574	1.21469e-06	4.54342e-06	0
hsa-mir-3074.MIMAT0015027	0.282277	0.148615	0.133662	1.23061e-06	4.58093e-06	0
hsa-mir-3198.MIMAT0015083	0.623241	0.421578	0.201663	1.22983e-06	4.58093e-06	0
hsa-mir-3937.MIMAT0018352	0.0551164	0.00548949	0.0496269	1.28738e-06	4.78081e-06	0
hsa-mir-16.MIMAT0000069	11.3588	11.1257	0.233083	1.32677e-06	4.91538e-06	0
hsa-mir-7855.MIMAT0030430	0.115395	0.0448601	0.0705352	1.37893e-06	5.09648e-06	0
hsa-mir-130b.MIMAT0004680	6.98568	6.70063	0.28505	1.40915e-06	5.19581e-06	0
hsa-mir-133a.MIMAT0026478	0.0551291	0.181428	-0.126299	1.44142e-06	5.30226e-06	0
hsa-mir-3940.MIMAT0019229	0.967216	0.679131	0.288085	1.60838e-06	5.87684e-06	0
hsa-mir-4473.MIMAT0019000	1.22597	0.885085	0.340888	1.60896e-06	5.87684e-06	0
hsa-mir-550a.MIMAT0003257	3.48526	3.1521	0.333166	1.60792e-06	5.87684e-06	0
hsa-mir-101-1.MIMAT0004513	4.10029	4.48801	-0.387712	2.06781e-06	7.53517e-06	0
hsa-mir-30e.MIMAT0000693	13.532	13.3346	0.197398	2.08427e-06	7.57738e-06	0
hsa-mir-765.MIMAT0003945	0.293723	0.163234	0.130489	2.13538e-06	7.7451e-06	0
hsa-mir-376a-2.MIMAT0022928	0.141858	0.0421109	0.0997472	2.29022e-06	8.2874e-06	0
hsa-mir-1185.MIMAT0005798	0.0670364	0.0154345	0.0516019	2.70943e-06	9.78159e-06	0
hsa-mir-10a.MIMAT0004555	0.724373	1.70738	-0.983004	2.8266e-06	1.0181e-05	0
hsa-mir-7112.MIMAT0028122	0.881054	0.623419	0.257635	3.12869e-06	1.12431e-05	0
hsa-mir-1915.MIMAT0007892	0.17328	0.0444107	0.128869	3.17227e-06	1.13734e-05	0
hsa-mir-708.MIMAT0004927	2.84395	2.19298	0.650968	3.30392e-06	1.18182e-05	0
hsa-mir-3174.MIMAT0015051	0.328864	0.180921	0.147943	3.38694e-06	1.20873e-05	0
hsa-mir-1912.MIMAT0007887	0.126922	0.0331527	0.0937691	3.77978e-06	1.34584e-05	0
hsa-mir-658.MIMAT0003336	0.347274	0.546384	-0.199109	4.63898e-06	1.648e-05	0
hsa-mir-17.MIMAT0000071	9.90055	10.237	-0.336418	4.81649e-06	1.70717e-05	0
hsa-mir-573.MIMAT0003238	0.825115	0.517087	0.308028	5.07099e-06	1.79329e-05	0
hsa-mir-548e.MIMAT0005874	1.7499	1.47714	0.272761	5.13001e-06	1.81004e-05	0
hsa-mir-6783.MIMAT0027466	0.364986	0.229787	0.135199	5.45584e-06	1.92065e-05	0
hsa-mir-548f.MIMAT0005895	0.155647	0.035989	0.119658	5.52408e-06	1.94028e-05	0
hsa-mir-4469.MIMAT0018996	0.293849	0.163615	0.130235	5.58299e-06	1.95656e-05	0
hsa-mir-331.MIMAT0000760	4.27321	4.02987	0.243344	5.70843e-06	1.99603e-05	0
hsa-mir-6815.MIMAT0027531	0.136449	0.0420511	0.0943975	5.81061e-06	2.0272e-05	0
hsa-mir-5001.MIMAT0021021	1.30574	1.07205	0.233686	6.3185e-06	2.19946e-05	0
hsa-mir-4772.MIMAT0019926	2.58465	2.12779	0.456857	6.48782e-06	2.25336e-05	0
hsa-mir-876.MIMAT0004924	0.469552	0.0937175	0.375835	6.65884e-06	2.30761e-05	0
hsa-mir-320b.MIMAT0005792	2.98757	3.35802	-0.370446	6.79975e-06	2.3512e-05	0
hsa-mir-4507.MIMAT0019044	0.0983115	0.0397103	0.0586011	7.19517e-06	2.48241e-05	0
hsa-mir-1247.MIMAT0022721	0.298455	0.187159	0.111295	7.38281e-06	2.54152e-05	0
hsa-mir-365b.MIMAT0022833	0.299453	0.167405	0.132048	8.42535e-06	2.89401e-05	0
hsa-mir-3154.MIMAT0015028	2.3017	2.61049	-0.308788	8.7677e-06	3.00497e-05	0
hsa-mir-383.MIMAT0000738	0.322544	0.0926959	0.229848	8.91015e-06	3.04708e-05	0
hsa-mir-5583.MIMAT0022282	0.0890165	0.0285291	0.0604874	8.93325e-06	3.04828e-05	0
hsa-mir-5706.MIMAT0022500	1.11875	0.908688	0.210064	8.98862e-06	3.06046e-05	0
hsa-mir-4726.MIMAT0019845	0.157588	0.0840246	0.0735638	9.13723e-06	3.10426e-05	0
hsa-mir-6503.MIMAT0025463	2.36071	1.79386	0.566851	9.1769e-06	3.11095e-05	0
hsa-mir-3187.MIMAT0015069	0.472849	0.309733	0.163116	1.0772e-05	3.64374e-05	0
hsa-mir-4754.MIMAT0019894	0.549217	0.378098	0.171119	1.13059e-05	3.81606e-05	0
hsa-mir-514a.MIMAT0002883	0.886703	0.532229	0.354474	1.15133e-05	3.87766e-05	0
hsa-mir-1269a.MIMAT0005923	0.192131	0.0747459	0.117385	1.25978e-05	4.23375e-05	0
hsa-mir-4646.MIMAT0019707	0.311765	0.179534	0.132231	1.29197e-05	4.33257e-05	0
hsa-mir-93.MIMAT0004509	6.28636	5.99678	0.289582	1.33312e-05	4.46095e-05	0
hsa-mir-3677.MIMAT0019221	0.61121	0.424136	0.187074	1.35452e-05	4.5228e-05	0
hsa-mir-3681.MIMAT0018108	0.242344	0.118526	0.123818	1.49775e-05	4.99035e-05	0
hsa-mir-1914.MIMAT0007889	0.215951	0.109383	0.106568	1.64219e-05	5.45993e-05	0
hsa-let-7f-1.MIMAT0004486	1.98603	2.26408	-0.278053	1.77384e-05	5.88506e-05	0
hsa-mir-129.MIMAT0000242	1.29334	1.00004	0.293298	1.81942e-05	6.01399e-05	0
hsa-mir-30b.MIMAT0004589	2.40528	2.71334	-0.308069	1.82043e-05	6.01399e-05	0
hsa-mir-324.MIMAT0000761	6.55556	6.19362	0.361945	1.98204e-05	6.53401e-05	0
hsa-mir-550b.MIMAT0018445	0.193986	0.0585955	0.13539	2.02664e-05	6.66691e-05	0
hsa-mir-7844.MIMAT0030419	0.176766	0.08343	0.0933365	2.26926e-05	7.44928e-05	0
hsa-mir-92b.MIMAT0004792	0.840624	0.598043	0.242581	2.55489e-05	8.36928e-05	0
hsa-mir-4668.MIMAT0019746	2.41877	2.05011	0.368664	2.56737e-05	8.3925e-05	0
hsa-mir-410.MIMAT0026558	0.0617822	0.0115325	0.0502497	2.59107e-05	8.4522e-05	0
hsa-mir-301b.MIMAT0004958	2.98997	2.57785	0.412119	2.7659e-05	9.00364e-05	0
hsa-mir-432.MIMAT0002815	0.0544463	0.00725574	0.0471906	3.02548e-05	9.82807e-05	0
hsa-mir-3678.MIMAT0018102	0.528437	0.371044	0.157393	3.19477e-05	0.000103564	0
hsa-mir-1304.MIMAT0005892	2.52899	2.23526	0.293723	3.47292e-05	0.000112347	0
hsa-mir-4752.MIMAT0019889	0.20433	0.0894837	0.114846	3.49084e-05	0.000112692	0
hsa-mir-6793.MIMAT0027486	0.90501	0.705194	0.199816	3.6356e-05	0.000117122	0
hsa-mir-330.MIMAT0000751	2.96249	2.70929	0.253208	3.77484e-05	0.000121356	0
hsa-mir-4532.MIMAT0019071	0.396468	0.825894	-0.429426	3.94541e-05	0.000126579	0
hsa-mir-19b-2.MIMAT0004492	0.0500948	0.0149003	0.0351945	4.05298e-05	0.000129762	0
hsa-mir-3678.MIMAT0018103	0.192646	0.10312	0.0895255	4.12151e-05	0.000131685	0
hsa-mir-4797.MIMAT0019973	0.78101	0.606337	0.174673	4.14989e-05	0.00013205	0
hsa-mir-7974.MIMAT0031177	0.749576	0.462185	0.287391	4.14403e-05	0.00013205	0
hsa-mir-1291.MIMAT0005881	2.01578	2.39326	-0.377484	4.18009e-05	0.000132739	0
hsa-mir-5090.MIMAT0021082	0.390312	0.23767	0.152643	4.30193e-05	0.00013633	0
hsa-mir-4787.MIMAT0019957	1.57511	1.18977	0.385341	4.33746e-05	0.00013698	0
hsa-mir-574.MIMAT0003239	6.16063	5.67689	0.48374	4.34004e-05	0.00013698	0
hsa-mir-3675.MIMAT0018099	0.0597276	0.00967853	0.0500491	4.54149e-05	0.000143048	0
hsa-mir-1258.MIMAT0005909	0.278794	0.0483057	0.230489	4.9731e-05	0.000156326	0
hsa-mir-425.MIMAT0003393	11.1918	10.8729	0.318922	5.04773e-05	0.000158352	0
hsa-mir-548au.MIMAT0022292	0.641603	0.477576	0.164027	5.15233e-05	0.000161308	0
hsa-mir-6782.MIMAT0027464	0.0860275	0.0370636	0.0489639	5.20818e-05	0.000162729	0
hsa-mir-374a.MIMAT0004688	11.0819	10.9532	0.128668	5.30398e-05	0.000165391	0
hsa-mir-184.MIMAT0000454	0.296544	0.142857	0.153687	5.42995e-05	0.00016898	0
hsa-mir-3683.MIMAT0018111	0.0654197	0.0152627	0.050157	5.84078e-05	0.000181402	0
hsa-mir-4449.MIMAT0018968	2.01572	3.00631	-0.99059	5.92573e-05	0.000183674	0
hsa-mir-3613.MIMAT0017990	5.5634	5.31015	0.253248	5.95741e-05	0.000184289	0
hsa-mir-6856.MIMAT0027612	0.114382	0.0571473	0.0572345	6.00929e-05	0.000185525	0
hsa-mir-942.MIMAT0026734	2.16994	1.94898	0.220961	6.07995e-05	0.000187335	0
hsa-mir-885.MIMAT0004947	1.35308	0.988309	0.364775	6.15666e-05	0.000189323	0
hsa-mir-580.MIMAT0003245	1.77885	1.57539	0.20346	6.17691e-05	0.000189571	0
hsa-mir-3690.MIMAT0018119	2.53241	2.1592	0.373217	6.32047e-05	0.000193596	0
hsa-mir-5010.MIMAT0021043	0.426479	0.234766	0.191713	6.4163e-05	0.000196145	0
hsa-mir-541.MIMAT0004919	0.0538804	0.00861179	0.0452686	6.51694e-05	0.000198831	0
hsa-mir-181d.MIMAT0026608	0.0374239	0.083412	-0.0459881	7.23454e-05	0.000220292	0
hsa-mir-147b.MIMAT0004928	0.192257	0.0929159	0.0993411	7.2722e-05	0.000220717	0
hsa-mir-16-2.MIMAT0004518	6.32208	6.1167	0.205381	7.27686e-05	0.000220717	0
hsa-mir-4786.MIMAT0019954	0.995951	0.80464	0.19131	8.04616e-05	0.000243576	0
hsa-mir-331.MIMAT0004700	2.42523	2.24767	0.177562	8.16136e-05	0.000246584	0
hsa-mir-876.MIMAT0004925	0.354247	0.0623288	0.291918	9.08478e-05	0.000273952	0
hsa-mir-4533.MIMAT0019072	0.540398	0.327989	0.212408	9.13141e-05	0.000274826	0
hsa-mir-6844.MIMAT0027589	0.372084	0.21196	0.160124	9.31246e-05	0.000279733	0
hsa-mir-1538.MIMAT0007400	0.843858	0.672722	0.171136	0.000100238	0.000299944	0
hsa-mir-3942.MIMAT0018358	1.25712	1.06501	0.192116	0.000100183	0.000299944	0
hsa-mir-508.MIMAT0004778	0.185188	0.0464883	0.1387	0.000100787	0.000300779	0
hsa-mir-6801.MIMAT0027502	0.150103	0.0718235	0.0782793	0.000100904	0.000300779	0
hsa-mir-4488.MIMAT0019022	0.154506	0.287392	-0.132886	0.000101442	0.000301803	0
hsa-mir-135a-1.MIMAT0004595	1.23281	0.559613	0.6732	0.000112709	0.000334261	0
hsa-mir-153.MIMAT0000439	1.2548	1.74419	-0.489397	0.000112781	0.000334261	0
hsa-mir-3183.MIMAT0015063	0.174955	0.0997715	0.0751833	0.000117604	0.000347234	0
hsa-mir-4664.MIMAT0019737	0.243491	0.142527	0.100964	0.000117454	0.000347234	0
hsa-mir-124.MIMAT0004591	0.0891696	0.0246486	0.0645209	0.000117973	0.000347663	0
hsa-mir-1247.MIMAT0005899	0.145795	0.0922569	0.0535377	0.000121936	0.000358661	0
hsa-mir-3187.MIMAT0019216	0.306112	0.188237	0.117875	0.000124851	0.000366543	0
hsa-mir-4691.MIMAT0019782	0.266364	0.179213	0.0871509	0.000126005	0.000369235	0
hsa-mir-4690.MIMAT0019780	0.306559	0.187863	0.118696	0.00013166	0.000385081	0
hsa-mir-6832.MIMAT0027565	0.456947	0.298684	0.158263	0.000133422	0.000388772	0
hsa-mir-6885.MIMAT0027671	0.24514	0.139863	0.105277	0.000133281	0.000388772	0
hsa-mir-6798.MIMAT0027497	0.743282	0.574612	0.168669	0.00013944	0.000405549	0
hsa-mir-6781.MIMAT0027463	0.301495	0.1765	0.124995	0.000154273	0.000447853	0
hsa-mir-490.MIMAT0004764	0.0401775	0.00891194	0.0312656	0.000156942	0.000454752	0
hsa-mir-6754.MIMAT0027408	0.277169	0.17978	0.0973891	0.000159325	0.0004608	0
hsa-mir-3120.MIMAT0014982	0.118964	0.038318	0.0806464	0.000165118	0.000476667	0
hsa-mir-2355.MIMAT0016895	6.87313	6.56567	0.307455	0.000169679	0.000488926	0
hsa-mir-6807.MIMAT0027514	0.353763	0.243591	0.110171	0.00017046	0.000490268	0
hsa-mir-4422.MIMAT0018935	0.108867	0.0491105	0.0597566	0.00017152	0.000491956	0
hsa-mir-6746.MIMAT0027393	0.0824027	0.0373352	0.0450676	0.000171679	0.000491956	0
hsa-mir-34a.MIMAT0000255	5.98009	6.50212	-0.522031	0.000175838	0.000502949	0
hsa-mir-7106.MIMAT0028109	0.0906789	0.0367005	0.0539784	0.000177003	0.000505353	0
hsa-mir-223.MIMAT0000280	14.3885	14.7136	-0.325134	0.000180763	0.000515142	0
hsa-mir-1288.MIMAT0026743	0.239891	0.147038	0.0928533	0.000206713	0.000588017	0
hsa-mir-3614.MIMAT0017993	2.11737	1.80562	0.311743	0.000212534	0.000603471	0
hsa-mir-4637.MIMAT0019694	0.106278	0.0438357	0.0624424	0.000228769	0.000648387	0
hsa-mir-668.MIMAT0003881	0.148631	0.0700991	0.0785321	0.000229324	0.000648779	0
hsa-mir-433.MIMAT0026554	0.0619765	0.0115071	0.0504694	0.000235786	0.00066585	0
hsa-mir-4632.MIMAT0019688	0.942961	0.739678	0.203283	0.000237067	0.000668255	0
hsa-mir-6503.MIMAT0025462	2.77986	2.25063	0.529228	0.000240725	0.000677339	0
hsa-mir-507.MIMAT0002879	0.0291138	0.00238242	0.0267314	0.000242007	0.000679716	0
hsa-mir-511.MIMAT0026606	0.123766	0.233228	-0.109462	0.000272402	0.000763707	0
hsa-mir-193a.MIMAT0000459	1.71431	1.39401	0.320296	0.000276094	0.000772666	0
hsa-mir-135a.MIMAT0000428	1.53987	0.93942	0.600446	0.000277639	0.000775595	0
hsa-mir-4690.MIMAT0019779	0.143819	0.0836346	0.0601842	0.000281725	0.000785598	0
hsa-mir-3163.MIMAT0015037	0.151908	0.0714522	0.0804553	0.000288402	0.000802779	0
hsa-mir-7152.MIMAT0028215	0.102342	0.0467744	0.055568	0.000289929	0.000805589	0
hsa-mir-5683.MIMAT0022472	1.23189	0.755199	0.476695	0.000301114	0.000833689	0
hsa-mir-6884.MIMAT0027668	0.227655	0.159582	0.0680732	0.000300974	0.000833689	0
hsa-mir-3656.MIMAT0018076	0.163037	0.232133	-0.0690959	0.000315842	0.000872915	0
hsa-mir-219b.MIMAT0019747	0.786445	0.632	0.154444	0.000322847	0.000890691	0
hsa-mir-483.MIMAT0004761	0.680732	0.406095	0.274636	0.00035534	0.0009786	0
hsa-mir-4536.MIMAT0020959	1.51344	1.29672	0.216714	0.00036229	0.000995978	0
hsa-mir-33a.MIMAT0004506	2.29895	2.0522	0.246757	0.000366156	0.00100483	0
hsa-mir-6740.MIMAT0027382	0.102529	0.0460213	0.056508	0.000371017	0.00101638	0
hsa-mir-582.MIMAT0004797	9.36808	8.74688	0.621203	0.00037572	0.00102745	0
hsa-let-7f.MIMAT0000067	14.7668	15.0284	-0.261563	0.000379164	0.00103505	0
hsa-mir-6735.MIMAT0027371	0.609958	0.45051	0.159448	0.000382827	0.00104322	0
hsa-mir-219b.MIMAT0019748	1.2162	1.04497	0.171232	0.000387104	0.00105303	0
hsa-mir-3613.MIMAT0017991	2.92839	2.67599	0.252398	0.000405734	0.00109795	0
hsa-mir-545.MIMAT0003165	0.29475	0.183374	0.111376	0.000404445	0.00109795	0
hsa-mir-6797.MIMAT0027495	0.309441	0.198729	0.110712	0.000405127	0.00109795	0
hsa-mir-5009.MIMAT0021041	0.357952	0.253784	0.104168	0.000412298	0.00111378	0
hsa-mir-491.MIMAT0002807	2.38792	2.17619	0.211727	0.000425955	0.00114868	0
hsa-mir-576.MIMAT0003241	5.77605	5.58485	0.191198	0.00044153	0.00118862	0
hsa-mir-371b.MIMAT0019893	0.356965	0.231849	0.125116	0.000450601	0.00121094	0
hsa-mir-6799.MIMAT0027499	0.228482	0.147229	0.0812538	0.000465215	0.00124806	0
hsa-mir-4725.MIMAT0019844	0.0667905	0.0296034	0.0371871	0.000466251	0.00124868	0
hsa-mir-4474.MIMAT0019001	0.188998	0.11644	0.0725578	0.000467292	0.00124932	0
hsa-mir-7-1.MIMAT0004553	7.55048	7.32728	0.223199	0.00047122	0.00125767	0
hsa-mir-1343.MIMAT0019776	1.45752	1.22608	0.231433	0.000475414	0.00126668	0
hsa-mir-6749.MIMAT0027399	0.12757	0.0716889	0.0558815	0.000499125	0.00132759	0
hsa-mir-3131.MIMAT0014996	0.147753	0.0645288	0.0832239	0.000502309	0.00133378	0
hsa-mir-146b.MIMAT0004766	7.46368	7.84486	-0.381174	0.000505271	0.00133903	0
hsa-mir-651.MIMAT0003321	3.06401	3.2703	-0.206285	0.00050601	0.00133903	0
hsa-mir-483.MIMAT0002173	0.304818	0.165411	0.139406	0.00050929	0.00134383	0
hsa-mir-6807.MIMAT0027515	0.172975	0.098217	0.0747583	0.000509552	0.00134383	0
hsa-mir-4492.MIMAT0019027	0.21928	0.406338	-0.187058	0.000517354	0.0013621	0
hsa-mir-24.MIMAT0000080	10.3239	10.0419	0.282038	0.000522625	0.00137366	0
hsa-mir-4467.MIMAT0018994	0.0726528	0.0291707	0.0434821	0.000527638	0.00138449	0
hsa-mir-3190.MIMAT0015073	0.295287	0.196384	0.0989037	0.000535821	0.0014036	0
hsa-mir-6715b.MIMAT0025843	0.159405	0.275435	-0.116031	0.000549706	0.00143755	0
hsa-mir-1908.MIMAT0026916	0.159656	0.0706247	0.0890317	0.000598805	0.00156332	0
hsa-mir-202.MIMAT0002811	0.521775	0.224959	0.296816	0.000622456	0.00162235	0
hsa-mir-3620.MIMAT0018001	0.416705	0.305557	0.111148	0.000651965	0.00169553	0
hsa-mir-508.MIMAT0002880	1.3902	0.99961	0.390587	0.000652715	0.00169553	0
hsa-mir-125b.MIMAT0000423	5.41878	5.86021	-0.44143	0.000661525	0.00171555	0
hsa-mir-146a.MIMAT0000449	9.76327	10.1067	-0.343458	0.000676202	0.00174831	0
hsa-mir-374b.MIMAT0004955	8.20733	8.03069	0.176635	0.000677191	0.00174831	0
hsa-mir-5586.MIMAT0022288	0.0587851	0.0239612	0.0348239	0.000677527	0.00174831	0
hsa-mir-130a.MIMAT0004593	1.47687	1.77586	-0.298994	0.000682185	0.00175742	0
hsa-mir-744.MIMAT0004946	4.5836	4.4177	0.165904	0.000686819	0.00176643	0
hsa-mir-4762.MIMAT0019910	0.363497	0.259969	0.103528	0.000704925	0.00180705	0
hsa-mir-548b.MIMAT0004798	0.0637163	0.0208226	0.0428937	0.000704937	0.00180705	0
hsa-mir-25.MIMAT0004498	1.89532	1.66279	0.232533	0.000706279	0.00180752	0
hsa-mir-1228.MIMAT0005582	0.258298	0.17635	0.0819471	0.000710606	0.0018156	0
hsa-mir-579.MIMAT0026616	1.45339	1.26153	0.191865	0.000742188	0.00189319	0
hsa-mir-1227.MIMAT0005580	0.283602	0.189569	0.0940328	0.00076084	0.00193759	0
hsa-mir-6767.MIMAT0027434	0.270745	0.171427	0.0993178	0.000794403	0.00201976	0
hsa-mir-708.MIMAT0004926	1.92884	1.49258	0.436261	0.00080618	0.00204635	0
hsa-mir-487b.MIMAT0026614	0.0838143	0.0253861	0.0584282	0.000845733	0.00213977	0
hsa-mir-5000.MIMAT0021020	2.38759	2.22677	0.16082	0.000844951	0.00213977	0
hsa-mir-642a.MIMAT0020924	0.254376	0.171139	0.083237	0.00085063	0.00214867	0
hsa-mir-20a.MIMAT0000075	12.0916	12.2979	-0.20633	0.000880118	0.00221955	0
hsa-mir-3130.MIMAT0014995	2.40114	2.12369	0.277458	0.000918837	0.00231001	0
hsa-mir-7114.MIMAT0028125	0.11499	0.0640638	0.0509262	0.000918958	0.00231001	0
hsa-mir-551b.MIMAT0003233	1.25833	0.911613	0.346715	0.000924624	0.00232051	0
hsa-mir-20a.MIMAT0004493	5.40178	5.74937	-0.347585	0.000990419	0.00248163	0
hsa-mir-4788.MIMAT0019958	0.0355469	0.00566421	0.0298827	0.000995977	0.00249154	0
hsa-mir-5582.MIMAT0022280	0.562375	0.427916	0.134459	0.00100102	0.00250015	0
hsa-mir-4640.MIMAT0019700	0.0312128	0.00939858	0.0218142	0.00102029	0.00254418	0
hsa-mir-627.MIMAT0003296	2.39204	2.1836	0.208432	0.00105278	0.00262099	0
hsa-mir-514a.MIMAT0022702	0.0341452	0.00672357	0.0274217	0.00105934	0.00263311	0
hsa-mir-5094.MIMAT0021086	0.170681	0.0811422	0.089539	0.00107665	0.00267189	0
hsa-mir-767.MIMAT0003883	0.0188862	0.00369619	0.01519	0.00110339	0.00273387	0
hsa-mir-217.MIMAT0000274	2.06446	1.45721	0.607251	0.00114062	0.00282162	0
hsa-mir-582.MIMAT0003247	6.28171	5.70561	0.576102	0.00118061	0.00291591	0
hsa-mir-4487.MIMAT0019021	0.191131	0.106802	0.0843282	0.0011845	0.00292088	0
hsa-mir-3127.MIMAT0014990	3.65657	3.46231	0.194264	0.00119337	0.00293811	0
hsa-mir-5003.MIMAT0021025	0.0562704	0.109115	-0.0528444	0.00122011	0.0029992	0
hsa-mir-509.MIMAT0002881	0.883862	0.601048	0.282814	0.00125626	0.00308318	0
hsa-mir-676.MIMAT0018204	0.279602	0.154314	0.125288	0.00131166	0.00321409	0
hsa-mir-3143.MIMAT0015012	0.691368	0.540443	0.150925	0.00133089	0.00325609	0
hsa-mir-3161.MIMAT0015035	0.86505	0.520452	0.344597	0.00133984	0.00327283	0
hsa-mir-3913.MIMAT0018187	2.79725	3.0008	-0.203547	0.00136755	0.00333527	0
hsa-mir-4677.MIMAT0019761	4.96181	5.18709	-0.225282	0.00138218	0.00336569	0
hsa-mir-4435.MIMAT0018951	0.199862	0.102762	0.0970999	0.00138557	0.00336868	0
hsa-mir-3607.MIMAT0017985	5.01099	5.40571	-0.394722	0.00141186	0.00342723	0
hsa-mir-6722.MIMAT0025854	0.0465712	0.0104718	0.0360993	0.0014292	0.00346392	0
hsa-mir-4433b.MIMAT0030414	0.872625	0.568333	0.304291	0.00143962	0.00348375	0
hsa-mir-4755.MIMAT0019896	0.449784	0.343432	0.106351	0.00144586	0.00349342	0
hsa-mir-3648.MIMAT0018068	1.15714	1.82322	-0.666082	0.00148382	0.00357957	0
hsa-mir-6894.MIMAT0027688	0.489168	0.347665	0.141503	0.00151974	0.00366055	0
hsa-mir-6855.MIMAT0027611	0.360819	0.253181	0.107639	0.00153578	0.00369346	0
hsa-mir-4516.MIMAT0019053	0.226536	0.42308	-0.196544	0.00155339	0.00373006	0
hsa-mir-676.MIMAT0018203	0.0615579	0.0281718	0.0333861	0.00177417	0.00425362	0
hsa-mir-6796.MIMAT0027492	0.146748	0.0822196	0.0645288	0.00178783	0.00427979	0
hsa-let-7c.MIMAT0000064	7.87942	8.30892	-0.429494	0.00180371	0.00431117	0
hsa-mir-153-2.MIMAT0026480	3.22672	3.84604	-0.619319	0.00183901	0.0043888	0
hsa-mir-1268b.MIMAT0018925	0.53149	0.382798	0.148693	0.00186538	0.00444492	0
hsa-mir-6813.MIMAT0027526	0.334499	0.225352	0.109147	0.00187383	0.00445822	0
hsa-mir-1238.MIMAT0005593	0.217652	0.118609	0.0990429	0.00188141	0.00446944	0
hsa-mir-4680.MIMAT0019765	0.231827	0.145575	0.0862517	0.00195175	0.00462945	0
hsa-mir-6882.MIMAT0027665	0.228956	0.135605	0.0933512	0.00202217	0.00478918	0
hsa-mir-99a.MIMAT0004511	0.644158	0.81078	-0.166622	0.00205923	0.00486955	0
hsa-mir-599.MIMAT0003267	0.0399205	0.0251458	0.0147747	0.0021337	0.00503799	0
hsa-mir-3177.MIMAT0015054	0.352471	0.249919	0.102553	0.00229734	0.00541615	0
hsa-mir-3145.MIMAT0019205	0.083495	0.0332719	0.0502231	0.00234305	0.00551485	0
hsa-mir-4661.MIMAT0019729	3.15752	2.89993	0.257598	0.00234892	0.00551485	0
hsa-mir-6730.MIMAT0027361	0.193878	0.116843	0.0770354	0.00234984	0.00551485	0
hsa-mir-7704.MIMAT0030019	0.83264	1.18759	-0.354946	0.00238819	0.00559642	0
hsa-mir-29b-1.MIMAT0004514	3.55338	3.23741	0.315964	0.00241083	0.00564098	0
hsa-mir-6774.MIMAT0027449	0.392152	0.280637	0.111515	0.00249171	0.00582148	0
hsa-mir-3193.MIMAT0015077	0.138823	0.0563576	0.0824659	0.00252341	0.00588669	0
hsa-mir-548e.MIMAT0026736	0.503837	0.396214	0.107623	0.00254719	0.00593328	0
hsa-mir-450a-2.MIMAT0031074	0.177933	0.115444	0.062489	0.00256284	0.00596081	0
hsa-mir-5584.MIMAT0022284	0.239541	0.314941	-0.0753995	0.00257772	0.00598648	0
hsa-mir-4741.MIMAT0019871	0.58192	0.468827	0.113093	0.00269369	0.00624648	0
hsa-mir-4781.MIMAT0019943	0.987399	0.852662	0.134737	0.00290658	0.00673013	0
hsa-mir-3926.MIMAT0018201	0.0437119	0.103452	-0.0597398	0.00298723	0.00690658	0
hsa-mir-3939.MIMAT0018355	0.199131	0.144031	0.0551004	0.00301458	0.00695947	0
hsa-mir-4766.MIMAT0019918	1.15616	0.981338	0.174825	0.00318726	0.00734722	0
hsa-mir-195.MIMAT0004615	0.488945	0.359752	0.129194	0.00322531	0.00742393	0
hsa-mir-155.MIMAT0000646	10.9404	11.1767	-0.236344	0.00325048	0.00747081	0
hsa-mir-653.MIMAT0003328	0.375359	0.217109	0.15825	0.00328994	0.00755037	0
hsa-mir-199a.MIMAT0000231	4.67241	4.24561	0.426806	0.00334116	0.00765661	0
hsa-mir-128.MIMAT0000424	8.42741	8.35609	0.0713225	0.00337142	0.0077146	0
hsa-mir-494.MIMAT0026607	0.128082	0.0554231	0.0726592	0.00343617	0.00785123	0
hsa-mir-548d.MIMAT0003323	1.45499	1.29799	0.156999	0.0035105	0.00800929	0
hsa-mir-129-2.MIMAT0004605	0.113869	0.0563484	0.0575201	0.00353009	0.0080422	0
hsa-mir-124.MIMAT0000422	0.153913	0.0799573	0.0739562	0.00355278	0.00808205	0
hsa-mir-548o.MIMAT0005919	1.17117	1.02468	0.146498	0.00356565	0.0080995	0
hsa-mir-6818.MIMAT0027536	0.301795	0.222196	0.0795986	0.00361688	0.00820388	0
hsa-mir-6718.MIMAT0025849	3.50692	3.1339	0.373021	0.00364452	0.00825455	0
hsa-mir-6837.MIMAT0027576	0.432677	0.332173	0.100504	0.00367848	0.00831935	0
hsa-mir-181a-2.MIMAT0004558	10.7181	10.3712	0.346895	0.00368641	0.00832518	0
hsa-mir-216a.MIMAT0000273	0.236178	0.0668602	0.169318	0.0039312	0.00886515	0
hsa-mir-561.MIMAT0022706	0.256629	0.105558	0.151071	0.00398836	0.00898103	0
hsa-mir-190a.MIMAT0026482	0.326832	0.217079	0.109752	0.00400672	0.00900933	0
hsa-mir-3675.MIMAT0018098	0.036373	0.0108956	0.0254774	0.00404421	0.0090805	0
hsa-mir-6857.MIMAT0027615	0.0656916	0.0264013	0.0392904	0.00407224	0.00913027	0
hsa-mir-7113.MIMAT0028123	0.139479	0.0850566	0.0544222	0.00414657	0.00928354	0
hsa-mir-1287.MIMAT0026738	2.89542	2.64788	0.247532	0.00416745	0.0093169	0
hsa-mir-1292.MIMAT0022948	0.099152	0.0450193	0.0541328	0.00427849	0.00955141	0
hsa-mir-197.MIMAT0022691	0.389508	0.283388	0.10612	0.00430219	0.00959056	0
hsa-mir-4714.MIMAT0019822	0.259335	0.174127	0.0852085	0.00433387	0.00964735	0
hsa-mir-1307.MIMAT0022727	8.93897	8.80964	0.129324	0.00436673	0.00970661	0
hsa-mir-32.MIMAT0000090	5.86857	5.70523	0.163347	0.00439977	0.00976612	0
hsa-mir-4443.MIMAT0018961	0.535115	0.405433	0.129682	0.00443895	0.00983905	0
hsa-mir-7111.MIMAT0028119	0.0668182	0.031404	0.0354142	0.00451319	0.00998936	0

## Sheet: targets_of_top31_miRs
MIMAT	miR	target
MIMAT0000087	hsa-miR-30a-5p	2018-09-07	H. sapiens	Functional MTI
MIMAT0001631	hsa-miR-451a	ABCB1	H. sapiens	Functional MTI
MIMAT0000447	hsa-miR-134-5p	ABCC1	H. sapiens	Functional MTI
MIMAT0000256	hsa-miR-181a-5p	ABCG2	H. sapiens	Functional MTI
MIMAT0000279	hsa-miR-222-3p	ABCG2	H. sapiens	Functional MTI
MIMAT0000087	hsa-miR-30a-5p	ABL1	H. sapiens	Functional MTI
MIMAT0000441	hsa-miR-9-5p	ACAT1	H. sapiens	Functional MTI
MIMAT0000243	hsa-miR-148a-3p	ACVR1	H. sapiens	Functional MTI
MIMAT0001631	hsa-miR-451a	ADAM10	H. sapiens	Functional MTI
MIMAT0000278	hsa-miR-221-3p	ADAM1A	H. sapiens	Functional MTI
MIMAT0000279	hsa-miR-222-3p	ADAM1A	H. sapiens	Functional MTI
MIMAT0000445	hsa-miR-126-3p	ADAM9	H. sapiens	Functional MTI
MIMAT0000278	hsa-miR-221-3p	ADAMTS6	H. sapiens	Functional MTI
MIMAT0000445	hsa-miR-126-3p	ADGRE5	H. sapiens	Functional MTI
MIMAT0000445	hsa-miR-126-3p	ADM	H. sapiens	Functional MTI
MIMAT0000256	hsa-miR-181a-5p	AHR	H. sapiens	Functional MTI
MIMAT0000445	hsa-miR-126-3p	AKT1	H. sapiens	Functional MTI
MIMAT0001631	hsa-miR-451a	AKT1	H. sapiens	Functional MTI
MIMAT0003389	hsa-miR-542-3p	AKT1	H. sapiens	Functional MTI
MIMAT0000063	hsa-let-7b-5p	AKT2	H. sapiens	Functional MTI
MIMAT0001413	hsa-miR-20b-5p	AKT3	H. sapiens	Functional MTI
MIMAT0000243	hsa-miR-148a-3p	ALCAM	H. sapiens	Functional MTI
MIMAT0003389	hsa-miR-542-3p	ANGPT2	H. sapiens	Functional MTI
MIMAT0000447	hsa-miR-134-5p	ANGPTL4	H. sapiens	Functional MTI
MIMAT0000278	hsa-miR-221-3p	ANXA1	H. sapiens	Functional MTI
MIMAT0000441	hsa-miR-9-5p	AP3B1	H. sapiens	Functional MTI
MIMAT0000278	hsa-miR-221-3p	APAF1	H. sapiens	Functional MTI
MIMAT0000103	hsa-miR-106a-5p	APC	H. sapiens	Functional MTI
MIMAT0000278	hsa-miR-221-3p	ARF4	H. sapiens	Functional MTI
MIMAT0002177	hsa-miR-486-5p	ARHGAP5	H. sapiens	Functional MTI
MIMAT0004697	hsa-miR-151a-5p	ARHGDIA	H. sapiens	Functional MTI
MIMAT0000279	hsa-miR-222-3p	ARID1A	H. sapiens	Functional MTI
MIMAT0000103	hsa-miR-106a-5p	ARID4B	H. sapiens	Functional MTI
MIMAT0001413	hsa-miR-20b-5p	ARID4B	H. sapiens	Functional MTI
MIMAT0000278	hsa-miR-221-3p	ARNT	H. sapiens	Functional MTI
MIMAT0000451	hsa-miR-150-5p	ARRB2	H. sapiens	Functional MTI
MIMAT0000278	hsa-miR-221-3p	ASZ1	H. sapiens	Functional MTI
MIMAT0000087	hsa-miR-30a-5p	ATF1	H. sapiens	Functional MTI
MIMAT0000256	hsa-miR-181a-5p	ATG5	H. sapiens	Functional MTI
MIMAT0000441	hsa-miR-9-5p	ATG5	H. sapiens	Functional MTI
MIMAT0000103	hsa-miR-106a-5p	ATG7	H. sapiens	Functional MTI
MIMAT0000103	hsa-miR-106a-5p	ATM	H. sapiens	Functional MTI
MIMAT0000256	hsa-miR-181a-5p	ATM	H. sapiens	Functional MTI
MIMAT0000087	hsa-miR-30a-5p	AVEN	H. sapiens	Functional MTI
MIMAT0000441	hsa-miR-9-5p	BACE1	H. sapiens	Functional MTI
MIMAT0001413	hsa-miR-20b-5p	BAMBI	H. sapiens	Functional MTI
MIMAT0000243	hsa-miR-148a-3p	BAX	H. sapiens	Functional MTI
MIMAT0000256	hsa-miR-181a-5p	BAX	H. sapiens	Functional MTI
MIMAT0000278	hsa-miR-221-3p	BBC3	H. sapiens	Functional MTI
MIMAT0000279	hsa-miR-222-3p	BBC3	H. sapiens	Functional MTI
MIMAT0000103	hsa-miR-106a-5p	BCL10	H. sapiens	Functional MTI
MIMAT0000087	hsa-miR-30a-5p	BCL11A	H. sapiens	Functional MTI
MIMAT0000445	hsa-miR-126-3p	BCL2	H. sapiens	Functional MTI
MIMAT0000243	hsa-miR-148a-3p	BCL2	H. sapiens	Functional MTI
MIMAT0000256	hsa-miR-181a-5p	BCL2	H. sapiens	Functional MTI
MIMAT0000258	hsa-miR-181c-5p	BCL2	H. sapiens	Functional MTI
MIMAT0002821	hsa-miR-181d-5p	BCL2	H. sapiens	Functional MTI
MIMAT0001631	hsa-miR-451a	BCL2	H. sapiens	Functional MTI
MIMAT0000441	hsa-miR-9-5p	BCL2	H. sapiens	Functional MTI
MIMAT0000243	hsa-miR-148a-3p	BCL2L11	H. sapiens	Functional MTI
MIMAT0000256	hsa-miR-181a-5p	BCL2L11	H. sapiens	Functional MTI
MIMAT0000441	hsa-miR-9-5p	BCL2L11	H. sapiens	Functional MTI
MIMAT0000087	hsa-miR-30a-5p	BCL9	H. sapiens	Functional MTI
MIMAT0000087	hsa-miR-30a-5p	BDNF	H. sapiens	Functional MTI
MIMAT0000278	hsa-miR-221-3p	BECN1	H. sapiens	Functional MTI
MIMAT0000088	hsa-miR-30a-3p	BECN1	H. sapiens	Functional MTI
MIMAT0000087	hsa-miR-30a-5p	BECN1	H. sapiens	Functional MTI
MIMAT0000441	hsa-miR-9-5p	BECN1	H. sapiens	Functional MTI
MIMAT0000451	hsa-miR-150-5p	BIRC5	H. sapiens	Functional MTI
MIMAT0003389	hsa-miR-542-3p	BIRC5	H. sapiens	Functional MTI
MIMAT0000753	hsa-miR-342-3p	BIRC6	H. sapiens	Functional MTI
MIMAT0000278	hsa-miR-221-3p	BMF	H. sapiens	Functional MTI
MIMAT0000279	hsa-miR-222-3p	BMF	H. sapiens	Functional MTI
MIMAT0000103	hsa-miR-106a-5p	BMP2	H. sapiens	Functional MTI
MIMAT0000753	hsa-miR-342-3p	BMP7	H. sapiens	Functional MTI
MIMAT0003389	hsa-miR-542-3p	BMP7	H. sapiens	Functional MTI
MIMAT0000258	hsa-miR-181c-5p	BMPR2	H. sapiens	Functional MTI
MIMAT0000278	hsa-miR-221-3p	BNIP3	H. sapiens	Functional MTI
MIMAT0000278	hsa-miR-221-3p	BNIP3L	H. sapiens	Functional MTI
MIMAT0001413	hsa-miR-20b-5p	BRCA1	H. sapiens	Functional MTI
MIMAT0000258	hsa-miR-181c-5p	BTBD3	H. sapiens	Functional MTI
MIMAT0001631	hsa-miR-451a	CAB39	H. sapiens	Functional MTI
MIMAT0000445	hsa-miR-126-3p	CADM1	H. sapiens	Functional MTI
MIMAT0000441	hsa-miR-9-5p	CAMKK2	H. sapiens	Functional MTI
MIMAT0000707	hsa-miR-363-3p	CASP3	H. sapiens	Functional MTI
MIMAT0000103	hsa-miR-106a-5p	CASP7	H. sapiens	Functional MTI
MIMAT0004697	hsa-miR-151a-5p	CASZ1	H. sapiens	Functional MTI
MIMAT0000451	hsa-miR-150-5p	CBL	H. sapiens	Functional MTI
MIMAT0000441	hsa-miR-9-5p	CBX7	H. sapiens	Functional MTI
MIMAT0000243	hsa-miR-148a-3p	CCKBR	H. sapiens	Functional MTI
MIMAT0000088	hsa-miR-30a-3p	CCN1	H. sapiens	Functional MTI
MIMAT0000063	hsa-let-7b-5p	CCNA2	H. sapiens	Functional MTI
MIMAT0000063	hsa-let-7b-5p	CCND1	H. sapiens	Functional MTI
MIMAT0000103	hsa-miR-106a-5p	CCND1	H. sapiens	Functional MTI
MIMAT0000441	hsa-miR-9-5p	CCND1	H. sapiens	Functional MTI
MIMAT0000063	hsa-let-7b-5p	CCND2	H. sapiens	Functional MTI
MIMAT0004600	hsa-miR-144-5p	CCNE1	H. sapiens	Functional MTI
MIMAT0000757	hsa-miR-151a-3p	CCNE1	H. sapiens	Functional MTI
MIMAT0004600	hsa-miR-144-5p	CCNE2	H. sapiens	Functional MTI
MIMAT0000087	hsa-miR-30a-5p	CCNE2	H. sapiens	Functional MTI
MIMAT0000441	hsa-miR-9-5p	CCNG1	H. sapiens	Functional MTI
MIMAT0000451	hsa-miR-150-5p	CCR6	H. sapiens	Functional MTI
MIMAT0000441	hsa-miR-9-5p	CD34	H. sapiens	Functional MTI
MIMAT0000087	hsa-miR-30a-5p	CD99	H. sapiens	Functional MTI
MIMAT0000243	hsa-miR-148a-3p	CDC25B	H. sapiens	Functional MTI
MIMAT0000063	hsa-let-7b-5p	CDC34	H. sapiens	Functional MTI
MIMAT0000087	hsa-miR-30a-5p	CDH1	H. sapiens	Functional MTI
MIMAT0000441	hsa-miR-9-5p	CDH1	H. sapiens	Functional MTI
MIMAT0002177	hsa-miR-486-5p	CDK4	H. sapiens	Functional MTI
MIMAT0000063	hsa-let-7b-5p	CDK6	H. sapiens	Functional MTI
MIMAT0000088	hsa-miR-30a-3p	CDK6	H. sapiens	Functional MTI
MIMAT0000103	hsa-miR-106a-5p	CDKN1A	H. sapiens	Functional MTI
MIMAT0000256	hsa-miR-181a-5p	CDKN1A	H. sapiens	Functional MTI
MIMAT0001413	hsa-miR-20b-5p	CDKN1A	H. sapiens	Functional MTI
MIMAT0000707	hsa-miR-363-3p	CDKN1A	H. sapiens	Functional MTI
MIMAT0000243	hsa-miR-148a-3p	CDKN1B	H. sapiens	Functional MTI
MIMAT0000256	hsa-miR-181a-5p	CDKN1B	H. sapiens	Functional MTI
MIMAT0000278	hsa-miR-221-3p	CDKN1B	H. sapiens	Functional MTI
MIMAT0000279	hsa-miR-222-3p	CDKN1B	H. sapiens	Functional MTI
MIMAT0000278	hsa-miR-221-3p	CDKN1C	H. sapiens	Functional MTI
MIMAT0000279	hsa-miR-222-3p	CDKN1C	H. sapiens	Functional MTI
MIMAT0001631	hsa-miR-451a	CDKN2D	H. sapiens	Functional MTI
MIMAT0000103	hsa-miR-106a-5p	CDX2	H. sapiens	Functional MTI
MIMAT0000256	hsa-miR-181a-5p	CDX2	H. sapiens	Functional MTI
MIMAT0000258	hsa-miR-181c-5p	CDX2	H. sapiens	Functional MTI
MIMAT0000441	hsa-miR-9-5p	CDX2	H. sapiens	Functional MTI
MIMAT0000256	hsa-miR-181a-5p	CEBPA	H. sapiens	Functional MTI
MIMAT0000088	hsa-miR-30a-3p	CEMIP2	H. sapiens	Functional MTI
MIMAT0000278	hsa-miR-221-3p	CERS2	H. sapiens	Functional MTI
MIMAT0000279	hsa-miR-222-3p	CERS2	H. sapiens	Functional MTI
MIMAT0000436	hsa-miR-144-3p	CFTR	H. sapiens	Functional MTI
MIMAT0000441	hsa-miR-9-5p	CHMP2B	H. sapiens	Functional MTI
MIMAT0000451	hsa-miR-150-5p	CISH	H. sapiens	Functional MTI
MIMAT0002177	hsa-miR-486-5p	CIT	H. sapiens	Functional MTI
MIMAT0002177	hsa-miR-486-5p	CLDN10	H. sapiens	Functional MTI
MIMAT0000256	hsa-miR-181a-5p	COL16A1	H. sapiens	Functional MTI
MIMAT0000063	hsa-let-7b-5p	COL3A1	H. sapiens	Functional MTI
MIMAT0000451	hsa-miR-150-5p	COL4A4	H. sapiens	Functional MTI
MIMAT0000278	hsa-miR-221-3p	CORO1A	H. sapiens	Functional MTI
MIMAT0000279	hsa-miR-222-3p	CORO1A	H. sapiens	Functional MTI
MIMAT0000063	hsa-let-7b-5p	CPEB1	H. sapiens	Functional MTI
MIMAT0000063	hsa-let-7b-5p	CPEB3	H. sapiens	Functional MTI
MIMAT0001631	hsa-miR-451a	CPNE3	H. sapiens	Functional MTI
MIMAT0000451	hsa-miR-150-5p	CREB1	H. sapiens	Functional MTI
MIMAT0000707	hsa-miR-363-3p	CREB1	H. sapiens	Functional MTI
MIMAT0000441	hsa-miR-9-5p	CREB1	H. sapiens	Functional MTI
MIMAT0000278	hsa-miR-221-3p	CREBZF	H. sapiens	Functional MTI
MIMAT0001413	hsa-miR-20b-5p	CRIM1	H. sapiens	Functional MTI
MIMAT0000445	hsa-miR-126-3p	CRK	H. sapiens	Functional MTI
MIMAT0000445	hsa-miR-126-3p	CRKL	H. sapiens	Functional MTI
MIMAT0000753	hsa-miR-342-3p	CTBP2	H. sapiens	Functional MTI
MIMAT0000278	hsa-miR-221-3p	CTCF	H. sapiens	Functional MTI
MIMAT0000256	hsa-miR-181a-5p	CTDSPL	H. sapiens	Functional MTI
MIMAT0000063	hsa-let-7b-5p	CTHRC1	H. sapiens	Functional MTI
MIMAT0000256	hsa-miR-181a-5p	CTNNB1	H. sapiens	Functional MTI
MIMAT0003389	hsa-miR-542-3p	CTTN	H. sapiens	Functional MTI
MIMAT0000441	hsa-miR-9-5p	CUL4A	H. sapiens	Functional MTI
MIMAT0000445	hsa-miR-126-3p	CXCL12	H. sapiens	Functional MTI
MIMAT0000278	hsa-miR-221-3p	CXCL12	H. sapiens	Functional MTI
MIMAT0000103	hsa-miR-106a-5p	CXCL8	H. sapiens	Functional MTI
MIMAT0000445	hsa-miR-126-3p	CXCR4	H. sapiens	Functional MTI
MIMAT0000451	hsa-miR-150-5p	CXCR4	H. sapiens	Functional MTI
MIMAT0000103	hsa-miR-106a-5p	CYP19A1	H. sapiens	Functional MTI
MIMAT0000063	hsa-let-7b-5p	CYP2J2	H. sapiens	Functional MTI
MIMAT0000441	hsa-miR-9-5p	CYP4Z1	H. sapiens	Functional MTI
MIMAT0001631	hsa-miR-451a	DCBLD2	H. sapiens	Functional MTI
MIMAT0000256	hsa-miR-181a-5p	DDIT4	H. sapiens	Functional MTI
MIMAT0000278	hsa-miR-221-3p	DDIT4	H. sapiens	Functional MTI
MIMAT0000278	hsa-miR-221-3p	DICER1	H. sapiens	Functional MTI
MIMAT0000279	hsa-miR-222-3p	DICER1	H. sapiens	Functional MTI
MIMAT0000441	hsa-miR-9-5p	DICER1	H. sapiens	Functional MTI
MIMAT0000278	hsa-miR-221-3p	DIRAS3	H. sapiens	Functional MTI
MIMAT0000279	hsa-miR-222-3p	DIRAS3	H. sapiens	Functional MTI
MIMAT0000441	hsa-miR-9-5p	DKK1	H. sapiens	Functional MTI
MIMAT0000278	hsa-miR-221-3p	DKK2	H. sapiens	Functional MTI
MIMAT0000279	hsa-miR-222-3p	DKK2	H. sapiens	Functional MTI
MIMAT0000445	hsa-miR-126-3p	DNMT1	H. sapiens	Functional MTI
MIMAT0000243	hsa-miR-148a-3p	DNMT1	H. sapiens	Functional MTI
MIMAT0000087	hsa-miR-30a-5p	DNMT1	H. sapiens	Functional MTI
MIMAT0000753	hsa-miR-342-3p	DNMT1	H. sapiens	Functional MTI
MIMAT0000243	hsa-miR-148a-3p	DNMT3B	H. sapiens	Functional MTI
MIMAT0002177	hsa-miR-486-5p	DOCK3	H. sapiens	Functional MTI
MIMAT0000258	hsa-miR-181c-5p	DPYSL2	H. sapiens	Functional MTI
MIMAT0000441	hsa-miR-9-5p	DRD2	H. sapiens	Functional MTI
MIMAT0000087	hsa-miR-30a-5p	DTL	H. sapiens	Functional MTI
MIMAT0000256	hsa-miR-181a-5p	DUSP5	H. sapiens	Functional MTI
MIMAT0000256	hsa-miR-181a-5p	DUSP6	H. sapiens	Functional MTI
MIMAT0000278	hsa-miR-221-3p	DVL2	H. sapiens	Functional MTI
MIMAT0000441	hsa-miR-9-5p	DYRK1B	H. sapiens	Functional MTI
MIMAT0000103	hsa-miR-106a-5p	E2F1	H. sapiens	Functional MTI
MIMAT0000753	hsa-miR-342-3p	E2F1	H. sapiens	Functional MTI
MIMAT0000063	hsa-let-7b-5p	E2F2	H. sapiens	Functional MTI
MIMAT0000256	hsa-miR-181a-5p	E2F5	H. sapiens	Functional MTI
MIMAT0004697	hsa-miR-151a-5p	E2F6	H. sapiens	Functional MTI
MIMAT0001413	hsa-miR-20b-5p	EFNB2	H. sapiens	Functional MTI
MIMAT0000445	hsa-miR-126-3p	EGFL7	H. sapiens	Functional MTI
MIMAT0000256	hsa-miR-181a-5p	EGR1	H. sapiens	Functional MTI
MIMAT0000451	hsa-miR-150-5p	EGR2	H. sapiens	Functional MTI
MIMAT0000441	hsa-miR-9-5p	ELAVL1	H. sapiens	Functional MTI
MIMAT0004694	hsa-miR-342-5p	ENG	H. sapiens	Functional MTI
MIMAT0000451	hsa-miR-150-5p	EP300	H. sapiens	Functional MTI
MIMAT0001413	hsa-miR-20b-5p	EPHB4	H. sapiens	Functional MTI
MIMAT0000447	hsa-miR-134-5p	ERBB2	H. sapiens	Functional MTI
MIMAT0000103	hsa-miR-106a-5p	ERCC1	H. sapiens	Functional MTI
MIMAT0000087	hsa-miR-30a-5p	ERG	H. sapiens	Functional MTI
MIMAT0000243	hsa-miR-148a-3p	ERRFI1	H. sapiens	Functional MTI
MIMAT0001413	hsa-miR-20b-5p	ESR1	H. sapiens	Functional MTI
MIMAT0000278	hsa-miR-221-3p	ESR1	H. sapiens	Functional MTI
MIMAT0000279	hsa-miR-222-3p	ESR1	H. sapiens	Functional MTI
MIMAT0000087	hsa-miR-30a-5p	ESR2	H. sapiens	Functional MTI
MIMAT0000436	hsa-miR-144-3p	ETS1	H. sapiens	Functional MTI
MIMAT0000278	hsa-miR-221-3p	ETS1	H. sapiens	Functional MTI
MIMAT0000279	hsa-miR-222-3p	ETS1	H. sapiens	Functional MTI
MIMAT0000087	hsa-miR-30a-5p	EYA2	H. sapiens	Functional MTI
MIMAT0000063	hsa-let-7b-5p	EZH2	H. sapiens	Functional MTI
MIMAT0000445	hsa-miR-126-3p	EZH2	H. sapiens	Functional MTI
MIMAT0000436	hsa-miR-144-3p	EZH2	H. sapiens	Functional MTI
MIMAT0000103	hsa-miR-106a-5p	FAS	H. sapiens	Functional MTI
MIMAT0002177	hsa-miR-486-5p	FBN1	H. sapiens	Functional MTI
MIMAT0000707	hsa-miR-363-3p	FBXW7	H. sapiens	Functional MTI
MIMAT0000436	hsa-miR-144-3p	FGG	H. sapiens	Functional MTI
MIMAT0000451	hsa-miR-150-5p	FLT3	H. sapiens	Functional MTI
MIMAT0000278	hsa-miR-221-3p	FMR1	H. sapiens	Functional MTI
MIMAT0000256	hsa-miR-181a-5p	FOS	H. sapiens	Functional MTI
MIMAT0000278	hsa-miR-221-3p	FOS	H. sapiens	Functional MTI
MIMAT0000279	hsa-miR-222-3p	FOS	H. sapiens	Functional MTI
MIMAT0000087	hsa-miR-30a-5p	FOXD1	H. sapiens	Functional MTI
MIMAT0000087	hsa-miR-30a-5p	FOXL2	H. sapiens	Functional MTI
MIMAT0000447	hsa-miR-134-5p	FOXM1	H. sapiens	Functional MTI
MIMAT0000279	hsa-miR-222-3p	FOXO1	H. sapiens	Functional MTI
MIMAT0002177	hsa-miR-486-5p	FOXO1	H. sapiens	Functional MTI
MIMAT0000441	hsa-miR-9-5p	FOXO1	H. sapiens	Functional MTI
MIMAT0000445	hsa-miR-126-3p	FOXO3	H. sapiens	Functional MTI
MIMAT0000278	hsa-miR-221-3p	FOXO3	H. sapiens	Functional MTI
MIMAT0000279	hsa-miR-222-3p	FOXO3	H. sapiens	Functional MTI
MIMAT0000441	hsa-miR-9-5p	FOXO3	H. sapiens	Functional MTI
MIMAT0000441	hsa-miR-9-5p	FOXP1	H. sapiens	Functional MTI
MIMAT0001413	hsa-miR-20b-5p	FZD6	H. sapiens	Functional MTI
MIMAT0003389	hsa-miR-542-3p	FZD7	H. sapiens	Functional MTI
MIMAT0000441	hsa-miR-9-5p	GALNT4	H. sapiens	Functional MTI
MIMAT0000707	hsa-miR-363-3p	GAP43	H. sapiens	Functional MTI
MIMAT0000279	hsa-miR-222-3p	GAS5	H. sapiens	Functional MTI
MIMAT0000256	hsa-miR-181a-5p	GATA6	H. sapiens	Functional MTI
MIMAT0000258	hsa-miR-181c-5p	GATA6	H. sapiens	Functional MTI
MIMAT0000441	hsa-miR-9-5p	GDNF	H. sapiens	Functional MTI
MIMAT0000753	hsa-miR-342-3p	GEMIN4	H. sapiens	Functional MTI
MIMAT0000278	hsa-miR-221-3p	GJA1	H. sapiens	Functional MTI
MIMAT0000279	hsa-miR-222-3p	GJA1	H. sapiens	Functional MTI
MIMAT0000279	hsa-miR-222-3p	GNAI2	H. sapiens	Functional MTI
MIMAT0000279	hsa-miR-222-3p	GNAI3	H. sapiens	Functional MTI
MIMAT0000447	hsa-miR-134-5p	GOLPH3	H. sapiens	Functional MTI
MIMAT0000256	hsa-miR-181a-5p	GPD1L	H. sapiens	Functional MTI
MIMAT0000256	hsa-miR-181a-5p	GPR78	H. sapiens	Functional MTI
MIMAT0000278	hsa-miR-221-3p	GRB10	H. sapiens	Functional MTI
MIMAT0000441	hsa-miR-9-5p	GSK3B	H. sapiens	Functional MTI
MIMAT0000087	hsa-miR-30a-5p	HCC	H. sapiens	Functional MTI
MIMAT0000441	hsa-miR-9-5p	HDAC4	H. sapiens	Functional MTI
MIMAT0000441	hsa-miR-9-5p	HES1	H. sapiens	Functional MTI
MIMAT0000103	hsa-miR-106a-5p	HIF1A	H. sapiens	Functional MTI
MIMAT0001413	hsa-miR-20b-5p	HIF1A	H. sapiens	Functional MTI
MIMAT0000256	hsa-miR-181a-5p	HIPK2	H. sapiens	Functional MTI
MIMAT0000103	hsa-miR-106a-5p	HIPK3	H. sapiens	Functional MTI
MIMAT0001413	hsa-miR-20b-5p	HIPK3	H. sapiens	Functional MTI
MIMAT0000707	hsa-miR-363-3p	HIVEP1	H. sapiens	Functional MTI
MIMAT0000243	hsa-miR-148a-3p	HLA-G	H. sapiens	Functional MTI
MIMAT0000063	hsa-let-7b-5p	HMGA2	H. sapiens	Functional MTI
MIMAT0000103	hsa-miR-106a-5p	HMGA2	H. sapiens	Functional MTI
MIMAT0000087	hsa-miR-30a-5p	HNF4G	H. sapiens	Functional MTI
MIMAT0000445	hsa-miR-126-3p	HOXA9	H. sapiens	Functional MTI
MIMAT0000278	hsa-miR-221-3p	HOXB5	H. sapiens	Functional MTI
MIMAT0000063	hsa-let-7b-5p	HRAS	H. sapiens	Functional MTI
MIMAT0000256	hsa-miR-181a-5p	HRAS	H. sapiens	Functional MTI
MIMAT0002821	hsa-miR-181d-5p	HRAS	H. sapiens	Functional MTI
MIMAT0000087	hsa-miR-30a-5p	HSPA5	H. sapiens	Functional MTI
MIMAT0000278	hsa-miR-221-3p	ICAM1	H. sapiens	Functional MTI
MIMAT0000441	hsa-miR-9-5p	ID2	H. sapiens	Functional MTI
MIMAT0000753	hsa-miR-342-3p	ID4	H. sapiens	Functional MTI
MIMAT0000063	hsa-let-7b-5p	IFNB1	H. sapiens	Functional MTI
MIMAT0000256	hsa-miR-181a-5p	IFNG	H. sapiens	Functional MTI
MIMAT0000063	hsa-let-7b-5p	IGF1R	H. sapiens	Functional MTI
MIMAT0002177	hsa-miR-486-5p	IGF1R	H. sapiens	Functional MTI
MIMAT0000441	hsa-miR-9-5p	IGF2BP1	H. sapiens	Functional MTI
MIMAT0000441	hsa-miR-9-5p	IGF2BP3	H. sapiens	Functional MTI
MIMAT0003389	hsa-miR-542-3p	IGFBP1	H. sapiens	Functional MTI
MIMAT0000445	hsa-miR-126-3p	IGFBP2	H. sapiens	Functional MTI
MIMAT0000243	hsa-miR-148a-3p	IKBKB	H. sapiens	Functional MTI
MIMAT0001631	hsa-miR-451a	IKBKB	H. sapiens	Functional MTI
MIMAT0000753	hsa-miR-342-3p	IKBKG	H. sapiens	Functional MTI
MIMAT0000103	hsa-miR-106a-5p	IL10	H. sapiens	Functional MTI
MIMAT0000733	hsa-miR-379-5p	IL11	H. sapiens	Functional MTI
MIMAT0000757	hsa-miR-151a-3p	IL12RB2	H. sapiens	Functional MTI
MIMAT0004697	hsa-miR-151a-5p	IL1RAPL1	H. sapiens	Functional MTI
MIMAT0000258	hsa-miR-181c-5p	IL2	H. sapiens	Functional MTI
MIMAT0001631	hsa-miR-451a	IL6	H. sapiens	Functional MTI
MIMAT0000441	hsa-miR-9-5p	IL6	H. sapiens	Functional MTI
MIMAT0001631	hsa-miR-451a	IL6R	H. sapiens	Functional MTI
MIMAT0000258	hsa-miR-181c-5p	IL7	H. sapiens	Functional MTI
MIMAT0003389	hsa-miR-542-3p	ILK	H. sapiens	Functional MTI
MIMAT0000243	hsa-miR-148a-3p	INO80	H. sapiens	Functional MTI
MIMAT0000256	hsa-miR-181a-5p	INPP4B	H. sapiens	Functional MTI
MIMAT0000445	hsa-miR-126-3p	IRS1	H. sapiens	Functional MTI
MIMAT0000436	hsa-miR-144-3p	IRS1	H. sapiens	Functional MTI
MIMAT0000243	hsa-miR-148a-3p	IRS1	H. sapiens	Functional MTI
MIMAT0000243	hsa-miR-148a-3p	ITGA5	H. sapiens	Functional MTI
MIMAT0000447	hsa-miR-134-5p	ITGB1	H. sapiens	Functional MTI
MIMAT0000087	hsa-miR-30a-5p	ITGB3	H. sapiens	Functional MTI
MIMAT0000243	hsa-miR-148a-3p	ITGB8	H. sapiens	Functional MTI
MIMAT0000256	hsa-miR-181a-5p	KAT2B	H. sapiens	Functional MTI
MIMAT0000278	hsa-miR-221-3p	KIT	H. sapiens	Functional MTI
MIMAT0000279	hsa-miR-222-3p	KIT	H. sapiens	Functional MTI
MIMAT0000441	hsa-miR-9-5p	KLF17	H. sapiens	Functional MTI
MIMAT0000256	hsa-miR-181a-5p	KLF6	H. sapiens	Functional MTI
MIMAT0000087	hsa-miR-30a-5p	KLF9	H. sapiens	Functional MTI
MIMAT0000441	hsa-miR-9-5p	KPNB1	H. sapiens	Functional MTI
MIMAT0000445	hsa-miR-126-3p	KRAS	H. sapiens	Functional MTI
MIMAT0000447	hsa-miR-134-5p	KRAS	H. sapiens	Functional MTI
MIMAT0000258	hsa-miR-181c-5p	KRAS	H. sapiens	Functional MTI
MIMAT0000258	hsa-miR-181c-5p	LATS2	H. sapiens	Functional MTI
MIMAT0000063	hsa-let-7b-5p	LGR4	H. sapiens	Functional MTI
MIMAT0000063	hsa-let-7b-5p	LIN28A	H. sapiens	Functional MTI
MIMAT0000087	hsa-miR-30a-5p	LOX	H. sapiens	Functional MTI
MIMAT0000445	hsa-miR-126-3p	LRP6	H. sapiens	Functional MTI
MIMAT0000243	hsa-miR-148a-3p	MAFB	H. sapiens	Functional MTI
MIMAT0000447	hsa-miR-134-5p	MAGI2	H. sapiens	Functional MTI
MIMAT0000441	hsa-miR-9-5p	MALAT1	H. sapiens	Functional MTI
MIMAT0002821	hsa-miR-181d-5p	MALT1	H. sapiens	Functional MTI
MIMAT0001631	hsa-miR-451a	MAP3K1	H. sapiens	Functional MTI
MIMAT0000436	hsa-miR-144-3p	MAP3K8	H. sapiens	Functional MTI
MIMAT0000256	hsa-miR-181a-5p	MAPK1	H. sapiens	Functional MTI
MIMAT0001631	hsa-miR-451a	MAPK1	H. sapiens	Functional MTI
MIMAT0000103	hsa-miR-106a-5p	MAPK9	H. sapiens	Functional MTI
MIMAT0001413	hsa-miR-20b-5p	MAPK9	H. sapiens	Functional MTI
MIMAT0000278	hsa-miR-221-3p	MBD2	H. sapiens	Functional MTI
MIMAT0000087	hsa-miR-30a-5p	MBNL2	H. sapiens	Functional MTI
MIMAT0000087	hsa-miR-30a-5p	MBNL3	H. sapiens	Functional MTI
MIMAT0000256	hsa-miR-181a-5p	MCL1	H. sapiens	Functional MTI
MIMAT0000258	hsa-miR-181c-5p	MECP2	H. sapiens	Functional MTI
MIMAT0000088	hsa-miR-30a-3p	MECP2	H. sapiens	Functional MTI
MIMAT0000256	hsa-miR-181a-5p	MEG3	H. sapiens	Functional MTI
MIMAT0002821	hsa-miR-181d-5p	MEG3	H. sapiens	Functional MTI
MIMAT0000278	hsa-miR-221-3p	MEOX2	H. sapiens	Functional MTI
MIMAT0000445	hsa-miR-126-3p	MERTK	H. sapiens	Functional MTI
MIMAT0000436	hsa-miR-144-3p	MET	H. sapiens	Functional MTI
MIMAT0004600	hsa-miR-144-5p	MET	H. sapiens	Functional MTI
MIMAT0000243	hsa-miR-148a-3p	MET	H. sapiens	Functional MTI
MIMAT0000103	hsa-miR-106a-5p	MFN2	H. sapiens	Functional MTI
MIMAT0002821	hsa-miR-181d-5p	MGMT	H. sapiens	Functional MTI
MIMAT0000278	hsa-miR-221-3p	MGMT	H. sapiens	Functional MTI
MIMAT0000279	hsa-miR-222-3p	MGMT	H. sapiens	Functional MTI
MIMAT0000103	hsa-miR-106a-5p	MGST2	H. sapiens	Functional MTI
MIMAT0001631	hsa-miR-451a	MIF	H. sapiens	Functional MTI
MIMAT0000441	hsa-miR-9-5p	MIRLET7D	H. sapiens	Functional MTI
MIMAT0000279	hsa-miR-222-3p	MMP1	H. sapiens	Functional MTI
MIMAT0000441	hsa-miR-9-5p	MMP13	H. sapiens	Functional MTI
MIMAT0000451	hsa-miR-150-5p	MMP14	H. sapiens	Functional MTI
MIMAT0000278	hsa-miR-221-3p	MMP2	H. sapiens	Functional MTI
MIMAT0001631	hsa-miR-451a	MMP2	H. sapiens	Functional MTI
MIMAT0000445	hsa-miR-126-3p	MMP7	H. sapiens	Functional MTI
MIMAT0000243	hsa-miR-148a-3p	MMP7	H. sapiens	Functional MTI
MIMAT0001631	hsa-miR-451a	MMP9	H. sapiens	Functional MTI
MIMAT0004697	hsa-miR-151a-5p	MPL	H. sapiens	Functional MTI
MIMAT0000258	hsa-miR-181c-5p	MST1	H. sapiens	Functional MTI
MIMAT0004697	hsa-miR-151a-5p	MT-CYB	H. sapiens	Functional MTI
MIMAT0000753	hsa-miR-342-3p	MTDH	H. sapiens	Functional MTI
MIMAT0003389	hsa-miR-542-3p	MTDH	H. sapiens	Functional MTI
MIMAT0000441	hsa-miR-9-5p	MTHFD1	H. sapiens	Functional MTI
MIMAT0000256	hsa-miR-181a-5p	MTMR3	H. sapiens	Functional MTI
MIMAT0000436	hsa-miR-144-3p	MTOR	H. sapiens	Functional MTI
MIMAT0000063	hsa-let-7b-5p	MTPN	H. sapiens	Functional MTI
MIMAT0000451	hsa-miR-150-5p	MUC4	H. sapiens	Functional MTI
MIMAT0000103	hsa-miR-106a-5p	MYB	H. sapiens	Functional MTI
MIMAT0000451	hsa-miR-150-5p	MYB	H. sapiens	Functional MTI
MIMAT0000278	hsa-miR-221-3p	MYBL1	H. sapiens	Functional MTI
MIMAT0001631	hsa-miR-451a	MYC	H. sapiens	Functional MTI
MIMAT0000103	hsa-miR-106a-5p	MYLIP	H. sapiens	Functional MTI
MIMAT0001413	hsa-miR-20b-5p	MYLIP	H. sapiens	Functional MTI
MIMAT0000441	hsa-miR-9-5p	MYOCD	H. sapiens	Functional MTI
MIMAT0004697	hsa-miR-151a-5p	N4BP1	H. sapiens	Functional MTI
MIMAT0004694	hsa-miR-342-5p	NAA10	H. sapiens	Functional MTI
MIMAT0000278	hsa-miR-221-3p	NAIP	H. sapiens	Functional MTI
MIMAT0000447	hsa-miR-134-5p	NANOG	H. sapiens	Functional MTI
MIMAT0000451	hsa-miR-150-5p	NANOG	H. sapiens	Functional MTI
MIMAT0000087	hsa-miR-30a-5p	NCAM1	H. sapiens	Functional MTI
MIMAT0000258	hsa-miR-181c-5p	NDRG2	H. sapiens	Functional MTI
MIMAT0000087	hsa-miR-30a-5p	NEDD4L	H. sapiens	Functional MTI
MIMAT0000087	hsa-miR-30a-5p	NEUROD1	H. sapiens	Functional MTI
MIMAT0000441	hsa-miR-9-5p	NF1	H. sapiens	Functional MTI
MIMAT0000088	hsa-miR-30a-3p	NFATC3	H. sapiens	Functional MTI
MIMAT0000436	hsa-miR-144-3p	NFE2L2	H. sapiens	Functional MTI
MIMAT0000441	hsa-miR-9-5p	NFKB1	H. sapiens	Functional MTI
MIMAT0000445	hsa-miR-126-3p	NFKBIA	H. sapiens	Functional MTI
MIMAT0000256	hsa-miR-181a-5p	NLK	H. sapiens	Functional MTI
MIMAT0000258	hsa-miR-181c-5p	NLK	H. sapiens	Functional MTI
MIMAT0000436	hsa-miR-144-3p	NOTCH1	H. sapiens	Functional MTI
MIMAT0000256	hsa-miR-181a-5p	NOTCH1	H. sapiens	Functional MTI
MIMAT0000088	hsa-miR-30a-3p	NOTCH1	H. sapiens	Functional MTI
MIMAT0000087	hsa-miR-30a-5p	NOTCH1	H. sapiens	Functional MTI
MIMAT0000707	hsa-miR-363-3p	NOTCH1	H. sapiens	Functional MTI
MIMAT0000441	hsa-miR-9-5p	NOTCH1	H. sapiens	Functional MTI
MIMAT0000441	hsa-miR-9-5p	NOTCH2	H. sapiens	Functional MTI
MIMAT0000451	hsa-miR-150-5p	NOTCH3	H. sapiens	Functional MTI
MIMAT0000258	hsa-miR-181c-5p	NOTCH4	H. sapiens	Functional MTI
MIMAT0000441	hsa-miR-9-5p	NOX4	H. sapiens	Functional MTI
MIMAT0000243	hsa-miR-148a-3p	NR1I2	H. sapiens	Functional MTI
MIMAT0000063	hsa-let-7b-5p	NR2E1	H. sapiens	Functional MTI
MIMAT0000441	hsa-miR-9-5p	NR2E1	H. sapiens	Functional MTI
MIMAT0000063	hsa-let-7b-5p	NRAS	H. sapiens	Functional MTI
MIMAT0000256	hsa-miR-181a-5p	NRAS	H. sapiens	Functional MTI
MIMAT0000243	hsa-miR-148a-3p	NRP1	H. sapiens	Functional MTI
MIMAT0000441	hsa-miR-9-5p	NRP1	H. sapiens	Functional MTI
MIMAT0002177	hsa-miR-486-5p	NRP2	H. sapiens	Functional MTI
MIMAT0000757	hsa-miR-151a-3p	NTRK3	H. sapiens	Functional MTI
MIMAT0000441	hsa-miR-9-5p	NTRK3	H. sapiens	Functional MTI
MIMAT0002177	hsa-miR-486-5p	OLFM4	H. sapiens	Functional MTI
MIMAT0000441	hsa-miR-9-5p	ONECUT2	H. sapiens	Functional MTI
MIMAT0000447	hsa-miR-134-5p	OPRM1	H. sapiens	Functional MTI
MIMAT0001631	hsa-miR-451a	OXTR	H. sapiens	Functional MTI
MIMAT0000451	hsa-miR-150-5p	P2RX7	H. sapiens	Functional MTI
MIMAT0000278	hsa-miR-221-3p	PAK1	H. sapiens	Functional MTI
MIMAT0000447	hsa-miR-134-5p	PAK2	H. sapiens	Functional MTI
MIMAT0000436	hsa-miR-144-3p	PBX3	H. sapiens	Functional MTI
MIMAT0000256	hsa-miR-181a-5p	PBX3	H. sapiens	Functional MTI
MIMAT0000441	hsa-miR-9-5p	PDGFRB	H. sapiens	Functional MTI
MIMAT0000243	hsa-miR-148a-3p	PDIA3	H. sapiens	Functional MTI
MIMAT0000707	hsa-miR-363-3p	PDPN	H. sapiens	Functional MTI
MIMAT0000445	hsa-miR-126-3p	PGR	H. sapiens	Functional MTI
MIMAT0000256	hsa-miR-181a-5p	PGR	H. sapiens	Functional MTI
MIMAT0000256	hsa-miR-181a-5p	PHLPP2	H. sapiens	Functional MTI
MIMAT0000087	hsa-miR-30a-5p	PIK3CD	H. sapiens	Functional MTI
MIMAT0000445	hsa-miR-126-3p	PIK3CG	H. sapiens	Functional MTI
MIMAT0000278	hsa-miR-221-3p	PIK3R1	H. sapiens	Functional MTI
MIMAT0002177	hsa-miR-486-5p	PIK3R1	H. sapiens	Functional MTI
MIMAT0003389	hsa-miR-542-3p	PIK3R1	H. sapiens	Functional MTI
MIMAT0000445	hsa-miR-126-3p	PIK3R2	H. sapiens	Functional MTI
MIMAT0000087	hsa-miR-30a-5p	PIK3R2	H. sapiens	Functional MTI
MIMAT0003389	hsa-miR-542-3p	PIM1	H. sapiens	Functional MTI
MIMAT0000445	hsa-miR-126-3p	PITPNC1	H. sapiens	Functional MTI
MIMAT0000436	hsa-miR-144-3p	PLAG1	H. sapiens	Functional MTI
MIMAT0000256	hsa-miR-181a-5p	PLAG1	H. sapiens	Functional MTI
MIMAT0000445	hsa-miR-126-3p	PLK2	H. sapiens	Functional MTI
MIMAT0000279	hsa-miR-222-3p	PLXNC1	H. sapiens	Functional MTI
MIMAT0000451	hsa-miR-150-5p	POLD3	H. sapiens	Functional MTI
MIMAT0000441	hsa-miR-9-5p	PPARA	H. sapiens	Functional MTI
MIMAT0001413	hsa-miR-20b-5p	PPARG	H. sapiens	Functional MTI
MIMAT0000279	hsa-miR-222-3p	PPP2R2A	H. sapiens	Functional MTI
MIMAT0000256	hsa-miR-181a-5p	PPP3CA	H. sapiens	Functional MTI
MIMAT0000256	hsa-miR-181a-5p	PRAP1	H. sapiens	Functional MTI
MIMAT0000258	hsa-miR-181c-5p	PRAP1	H. sapiens	Functional MTI
MIMAT0000063	hsa-let-7b-5p	PRDM1	H. sapiens	Functional MTI
MIMAT0000279	hsa-miR-222-3p	PRDM1	H. sapiens	Functional MTI
MIMAT0000087	hsa-miR-30a-5p	PRDM1	H. sapiens	Functional MTI
MIMAT0000441	hsa-miR-9-5p	PRDM1	H. sapiens	Functional MTI
MIMAT0000441	hsa-miR-9-5p	PRKAA1	H. sapiens	Functional MTI
MIMAT0000451	hsa-miR-150-5p	PRKCA	H. sapiens	Functional MTI
MIMAT0000256	hsa-miR-181a-5p	PRKN	H. sapiens	Functional MTI
MIMAT0000256	hsa-miR-181a-5p	PROX1	H. sapiens	Functional MTI
MIMAT0000087	hsa-miR-30a-5p	PRRT2	H. sapiens	Functional MTI
MIMAT0000441	hsa-miR-9-5p	PRTG	H. sapiens	Functional MTI
MIMAT0000103	hsa-miR-106a-5p	PTEN	H. sapiens	Functional MTI
MIMAT0000436	hsa-miR-144-3p	PTEN	H. sapiens	Functional MTI
MIMAT0000256	hsa-miR-181a-5p	PTEN	H. sapiens	Functional MTI
MIMAT0000258	hsa-miR-181c-5p	PTEN	H. sapiens	Functional MTI
MIMAT0001413	hsa-miR-20b-5p	PTEN	H. sapiens	Functional MTI
MIMAT0000278	hsa-miR-221-3p	PTEN	H. sapiens	Functional MTI
MIMAT0000279	hsa-miR-222-3p	PTEN	H. sapiens	Functional MTI
MIMAT0002177	hsa-miR-486-5p	PTEN	H. sapiens	Functional MTI
MIMAT0000436	hsa-miR-144-3p	PTGS2	H. sapiens	Functional MTI
MIMAT0000733	hsa-miR-379-5p	PTK2	H. sapiens	Functional MTI
MIMAT0000256	hsa-miR-181a-5p	PTPN11	H. sapiens	Functional MTI
MIMAT0000256	hsa-miR-181a-5p	PTPN22	H. sapiens	Functional MTI
MIMAT0000445	hsa-miR-126-3p	PTPN7	H. sapiens	Functional MTI
MIMAT0000447	hsa-miR-134-5p	PUM2	H. sapiens	Functional MTI
MIMAT0000243	hsa-miR-148a-3p	QKI	H. sapiens	Functional MTI
MIMAT0001631	hsa-miR-451a	RAB14	H. sapiens	Functional MTI
MIMAT0000278	hsa-miR-221-3p	RAB1A	H. sapiens	Functional MTI
MIMAT0000447	hsa-miR-134-5p	RAB27A	H. sapiens	Functional MTI
MIMAT0000441	hsa-miR-9-5p	RAB34	H. sapiens	Functional MTI
MIMAT0000087	hsa-miR-30a-5p	RAB38	H. sapiens	Functional MTI
MIMAT0001631	hsa-miR-451a	RAB5A	H. sapiens	Functional MTI
MIMAT0000278	hsa-miR-221-3p	RAD51	H. sapiens	Functional MTI
MIMAT0000256	hsa-miR-181a-5p	RALA	H. sapiens	Functional MTI
MIMAT0000256	hsa-miR-181a-5p	RAP1B	H. sapiens	Functional MTI
MIMAT0000258	hsa-miR-181c-5p	RAP1B	H. sapiens	Functional MTI
MIMAT0002821	hsa-miR-181d-5p	RAP1B	H. sapiens	Functional MTI
MIMAT0000441	hsa-miR-9-5p	RAP2A	H. sapiens	Functional MTI
MIMAT0000103	hsa-miR-106a-5p	RARB	H. sapiens	Functional MTI
MIMAT0000256	hsa-miR-181a-5p	RASSF1	H. sapiens	Functional MTI
MIMAT0000278	hsa-miR-221-3p	RB1	H. sapiens	Functional MTI
MIMAT0001413	hsa-miR-20b-5p	RB1CC1	H. sapiens	Functional MTI
MIMAT0000103	hsa-miR-106a-5p	RBL2	H. sapiens	Functional MTI
MIMAT0000063	hsa-let-7b-5p	RDH10	H. sapiens	Functional MTI
MIMAT0000278	hsa-miR-221-3p	RECK	H. sapiens	Functional MTI
MIMAT0000279	hsa-miR-222-3p	RECK	H. sapiens	Functional MTI
MIMAT0000707	hsa-miR-363-3p	REG4	H. sapiens	Functional MTI
MIMAT0000441	hsa-miR-9-5p	REST	H. sapiens	Functional MTI
MIMAT0000256	hsa-miR-181a-5p	RGS5	H. sapiens	Functional MTI
MIMAT0000445	hsa-miR-126-3p	RHOU	H. sapiens	Functional MTI
MIMAT0000103	hsa-miR-106a-5p	RND3	H. sapiens	Functional MTI
MIMAT0000256	hsa-miR-181a-5p	RNF2	H. sapiens	Functional MTI
MIMAT0000445	hsa-miR-126-3p	ROCK1	H. sapiens	Functional MTI
MIMAT0004600	hsa-miR-144-5p	ROCK1	H. sapiens	Functional MTI
MIMAT0000243	hsa-miR-148a-3p	ROCK1	H. sapiens	Functional MTI
MIMAT0004600	hsa-miR-144-5p	ROCK2	H. sapiens	Functional MTI
MIMAT0000087	hsa-miR-30a-5p	RPA1	H. sapiens	Functional MTI
MIMAT0003389	hsa-miR-542-3p	RPS23	H. sapiens	Functional MTI
MIMAT0000243	hsa-miR-148a-3p	RPS6KA5	H. sapiens	Functional MTI
MIMAT0000103	hsa-miR-106a-5p	RUNX1	H. sapiens	Functional MTI
MIMAT0004600	hsa-miR-144-5p	RUNX1	H. sapiens	Functional MTI
MIMAT0000256	hsa-miR-181a-5p	RUNX1	H. sapiens	Functional MTI
MIMAT0000278	hsa-miR-221-3p	RUNX1	H. sapiens	Functional MTI
MIMAT0000441	hsa-miR-9-5p	RUNX1	H. sapiens	Functional MTI
MIMAT0000279	hsa-miR-222-3p	RUNX2	H. sapiens	Functional MTI
MIMAT0000088	hsa-miR-30a-3p	RUNX2	H. sapiens	Functional MTI
MIMAT0000087	hsa-miR-30a-5p	RUNX2	H. sapiens	Functional MTI
MIMAT0000103	hsa-miR-106a-5p	RUNX3	H. sapiens	Functional MTI
MIMAT0000243	hsa-miR-148a-3p	RUNX3	H. sapiens	Functional MTI
MIMAT0000243	hsa-miR-148a-3p	S1PR1	H. sapiens	Functional MTI
MIMAT0000707	hsa-miR-363-3p	S1PR1	H. sapiens	Functional MTI
MIMAT0000256	hsa-miR-181a-5p	SAMHD1	H. sapiens	Functional MTI
MIMAT0000258	hsa-miR-181c-5p	SAV1	H. sapiens	Functional MTI
MIMAT0000243	hsa-miR-148a-3p	SERPINE1	H. sapiens	Functional MTI
MIMAT0000258	hsa-miR-181c-5p	SGMS1	H. sapiens	Functional MTI
MIMAT0000103	hsa-miR-106a-5p	SIRPA	H. sapiens	Functional MTI
MIMAT0000445	hsa-miR-126-3p	SIRT1	H. sapiens	Functional MTI
MIMAT0000256	hsa-miR-181a-5p	SIRT1	H. sapiens	Functional MTI
MIMAT0000258	hsa-miR-181c-5p	SIRT1	H. sapiens	Functional MTI
MIMAT0000441	hsa-miR-9-5p	SIRT1	H. sapiens	Functional MTI
MIMAT0000087	hsa-miR-30a-5p	SKP2	H. sapiens	Functional MTI
MIMAT0000451	hsa-miR-150-5p	SLC2A1	H. sapiens	Functional MTI
MIMAT0000103	hsa-miR-106a-5p	SLC2A3	H. sapiens	Functional MTI
MIMAT0000445	hsa-miR-126-3p	SLC7A5	H. sapiens	Functional MTI
MIMAT0000088	hsa-miR-30a-3p	SLC7A6	H. sapiens	Functional MTI
MIMAT0000087	hsa-miR-30a-5p	SMAD1	H. sapiens	Functional MTI
MIMAT0000243	hsa-miR-148a-3p	SMAD2	H. sapiens	Functional MTI
MIMAT0002177	hsa-miR-486-5p	SMAD2	H. sapiens	Functional MTI
MIMAT0000436	hsa-miR-144-3p	SMAD4	H. sapiens	Functional MTI
MIMAT0004600	hsa-miR-144-5p	SMAD4	H. sapiens	Functional MTI
MIMAT0000279	hsa-miR-222-3p	SMAD5	H. sapiens	Functional MTI
MIMAT0004697	hsa-miR-151a-5p	SMARCA5	H. sapiens	Functional MTI
MIMAT0000087	hsa-miR-30a-5p	SNAI1	H. sapiens	Functional MTI
MIMAT0002177	hsa-miR-486-5p	SNAI1	H. sapiens	Functional MTI
MIMAT0000278	hsa-miR-221-3p	SOCS1	H. sapiens	Functional MTI
MIMAT0000278	hsa-miR-221-3p	SOCS3	H. sapiens	Functional MTI
MIMAT0000441	hsa-miR-9-5p	SOCS5	H. sapiens	Functional MTI
MIMAT0000279	hsa-miR-222-3p	SOD2	H. sapiens	Functional MTI
MIMAT0004697	hsa-miR-151a-5p	SOX17	H. sapiens	Functional MTI
MIMAT0000445	hsa-miR-126-3p	SOX2	H. sapiens	Functional MTI
MIMAT0004909	hsa-miR-450b-5p	SOX2	H. sapiens	Functional MTI
MIMAT0000441	hsa-miR-9-5p	SOX7	H. sapiens	Functional MTI
MIMAT0000451	hsa-miR-150-5p	SP1	H. sapiens	Functional MTI
MIMAT0000445	hsa-miR-126-3p	SPRED1	H. sapiens	Functional MTI
MIMAT0000451	hsa-miR-150-5p	SRCIN1	H. sapiens	Functional MTI
MIMAT0000753	hsa-miR-342-3p	SREBF1	H. sapiens	Functional MTI
MIMAT0000753	hsa-miR-342-3p	SREBF2	H. sapiens	Functional MTI
MIMAT0000441	hsa-miR-9-5p	SRF	H. sapiens	Functional MTI
MIMAT0000441	hsa-miR-9-5p	SRSF1	H. sapiens	Functional MTI
MIMAT0000451	hsa-miR-150-5p	SSSCA1	H. sapiens	Functional MTI
MIMAT0000279	hsa-miR-222-3p	SSSCA1	H. sapiens	Functional MTI
MIMAT0000278	hsa-miR-221-3p	SSX2IP	H. sapiens	Functional MTI
MIMAT0000279	hsa-miR-222-3p	SSX2IP	H. sapiens	Functional MTI
MIMAT0000258	hsa-miR-181c-5p	ST8SIA4	H. sapiens	Functional MTI
MIMAT0000441	hsa-miR-9-5p	STARD13	H. sapiens	Functional MTI
MIMAT0000451	hsa-miR-150-5p	STAT1	H. sapiens	Functional MTI
MIMAT0000103	hsa-miR-106a-5p	STAT3	H. sapiens	Functional MTI
MIMAT0000243	hsa-miR-148a-3p	STAT3	H. sapiens	Functional MTI
MIMAT0000256	hsa-miR-181a-5p	STAT3	H. sapiens	Functional MTI
MIMAT0001413	hsa-miR-20b-5p	STAT3	H. sapiens	Functional MTI
MIMAT0000278	hsa-miR-221-3p	STAT5A	H. sapiens	Functional MTI
MIMAT0000279	hsa-miR-222-3p	STAT5A	H. sapiens	Functional MTI
MIMAT0000447	hsa-miR-134-5p	STAT5B	H. sapiens	Functional MTI
MIMAT0000451	hsa-miR-150-5p	STAT5B	H. sapiens	Functional MTI
MIMAT0000441	hsa-miR-9-5p	STAU1	H. sapiens	Functional MTI
MIMAT0000441	hsa-miR-9-5p	STMN1	H. sapiens	Functional MTI
MIMAT0000753	hsa-miR-342-3p	TAB2	H. sapiens	Functional MTI
MIMAT0000087	hsa-miR-30a-5p	TAB3	H. sapiens	Functional MTI
MIMAT0000753	hsa-miR-342-3p	TAB3	H. sapiens	Functional MTI
MIMAT0000278	hsa-miR-221-3p	TBK1	H. sapiens	Functional MTI
MIMAT0000278	hsa-miR-221-3p	TCEAL1	H. sapiens	Functional MTI
MIMAT0000279	hsa-miR-222-3p	TCEAL1	H. sapiens	Functional MTI
MIMAT0000445	hsa-miR-126-3p	TCF4	H. sapiens	Functional MTI
MIMAT0000256	hsa-miR-181a-5p	TCF4	H. sapiens	Functional MTI
MIMAT0000445	hsa-miR-126-3p	TEK	H. sapiens	Functional MTI
MIMAT0000256	hsa-miR-181a-5p	TERT	H. sapiens	Functional MTI
MIMAT0000087	hsa-miR-30a-5p	TET1	H. sapiens	Functional MTI
MIMAT0000436	hsa-miR-144-3p	TGFB1	H. sapiens	Functional MTI
MIMAT0000243	hsa-miR-148a-3p	TGFB2	H. sapiens	Functional MTI
MIMAT0000441	hsa-miR-9-5p	TGFBI	H. sapiens	Functional MTI
MIMAT0000063	hsa-let-7b-5p	TGFBR1	H. sapiens	Functional MTI
MIMAT0000258	hsa-miR-181c-5p	TGFBR1	H. sapiens	Functional MTI
MIMAT0000103	hsa-miR-106a-5p	TGFBR2	H. sapiens	Functional MTI
MIMAT0000258	hsa-miR-181c-5p	TGFBR2	H. sapiens	Functional MTI
MIMAT0000441	hsa-miR-9-5p	TGFBR2	H. sapiens	Functional MTI
MIMAT0000258	hsa-miR-181c-5p	TGFBRAP1	H. sapiens	Functional MTI
MIMAT0004600	hsa-miR-144-5p	TGIF1	H. sapiens	Functional MTI
MIMAT0000243	hsa-miR-148a-3p	TGIF2	H. sapiens	Functional MTI
MIMAT0000088	hsa-miR-30a-3p	THBS1	H. sapiens	Functional MTI
MIMAT0000278	hsa-miR-221-3p	TICAM1	H. sapiens	Functional MTI
MIMAT0000256	hsa-miR-181a-5p	TIMP1	H. sapiens	Functional MTI
MIMAT0000103	hsa-miR-106a-5p	TIMP2	H. sapiens	Functional MTI
MIMAT0000278	hsa-miR-221-3p	TIMP3	H. sapiens	Functional MTI
MIMAT0000279	hsa-miR-222-3p	TIMP3	H. sapiens	Functional MTI
MIMAT0000063	hsa-let-7b-5p	TLR4	H. sapiens	Functional MTI
MIMAT0000441	hsa-miR-9-5p	TM4SF1	H. sapiens	Functional MTI
MIMAT0000243	hsa-miR-148a-3p	TMED7	H. sapiens	Functional MTI
MIMAT0000278	hsa-miR-221-3p	TMED7	H. sapiens	Functional MTI
MIMAT0000279	hsa-miR-222-3p	TMED7	H. sapiens	Functional MTI
MIMAT0001631	hsa-miR-451a	TMED7	H. sapiens	Functional MTI
MIMAT0000441	hsa-miR-9-5p	TNFAIP8	H. sapiens	Functional MTI
MIMAT0000063	hsa-let-7b-5p	TNFRSF10B	H. sapiens	Functional MTI
MIMAT0000278	hsa-miR-221-3p	TNFSF10	H. sapiens	Functional MTI
MIMAT0000279	hsa-miR-222-3p	TNFSF10	H. sapiens	Functional MTI
MIMAT0000087	hsa-miR-30a-5p	TNRC6A	H. sapiens	Functional MTI
MIMAT0000451	hsa-miR-150-5p	TP53	H. sapiens	Functional MTI
MIMAT0004697	hsa-miR-151a-5p	TP53	H. sapiens	Functional MTI
MIMAT0000087	hsa-miR-30a-5p	TP53	H. sapiens	Functional MTI
MIMAT0000087	hsa-miR-30a-5p	TRAF3IP2	H. sapiens	Functional MTI
MIMAT0000258	hsa-miR-181c-5p	TRIM2	H. sapiens	Functional MTI
MIMAT0000278	hsa-miR-221-3p	TRPS1	H. sapiens	Functional MTI
MIMAT0000279	hsa-miR-222-3p	TRPS1	H. sapiens	Functional MTI
MIMAT0001631	hsa-miR-451a	TSC1	H. sapiens	Functional MTI
MIMAT0000436	hsa-miR-144-3p	TTN	H. sapiens	Functional MTI
MIMAT0000087	hsa-miR-30a-5p	TUBB4B	H. sapiens	Functional MTI
MIMAT0000436	hsa-miR-144-3p	TUG1	H. sapiens	Functional MTI
MIMAT0000256	hsa-miR-181a-5p	TUSC3	H. sapiens	Functional MTI
MIMAT0000757	hsa-miR-151a-3p	TWIST1	H. sapiens	Functional MTI
MIMAT0000256	hsa-miR-181a-5p	TWIST1	H. sapiens	Functional MTI
MIMAT0000441	hsa-miR-9-5p	UHRF1	H. sapiens	Functional MTI
MIMAT0000243	hsa-miR-148a-3p	USP4	H. sapiens	Functional MTI
MIMAT0000243	hsa-miR-148a-3p	VAV2	H. sapiens	Functional MTI
MIMAT0000445	hsa-miR-126-3p	VCAM1	H. sapiens	Functional MTI
MIMAT0000103	hsa-miR-106a-5p	VEGFA	H. sapiens	Functional MTI
MIMAT0000445	hsa-miR-126-3p	VEGFA	H. sapiens	Functional MTI
MIMAT0000447	hsa-miR-134-5p	VEGFA	H. sapiens	Functional MTI
MIMAT0000451	hsa-miR-150-5p	VEGFA	H. sapiens	Functional MTI
MIMAT0001413	hsa-miR-20b-5p	VEGFA	H. sapiens	Functional MTI
MIMAT0000088	hsa-miR-30a-3p	VEZT	H. sapiens	Functional MTI
MIMAT0000279	hsa-miR-222-3p	VGLL4	H. sapiens	Functional MTI
MIMAT0000447	hsa-miR-134-5p	VIM	H. sapiens	Functional MTI
MIMAT0000256	hsa-miR-181a-5p	WIF1	H. sapiens	Functional MTI
MIMAT0000243	hsa-miR-148a-3p	WNT1	H. sapiens	Functional MTI
MIMAT0000243	hsa-miR-148a-3p	WNT10B	H. sapiens	Functional MTI
MIMAT0000088	hsa-miR-30a-3p	XBP1	H. sapiens	Functional MTI
MIMAT0000256	hsa-miR-181a-5p	XIAP	H. sapiens	Functional MTI
MIMAT0000436	hsa-miR-144-3p	XIST	H. sapiens	Functional MTI
MIMAT0000441	hsa-miR-9-5p	ZC3H12A	H. sapiens	Functional MTI
MIMAT0000447	hsa-miR-134-5p	ZDHHC9	H. sapiens	Functional MTI
MIMAT0000436	hsa-miR-144-3p	ZEB1	H. sapiens	Functional MTI
MIMAT0000451	hsa-miR-150-5p	ZEB1	H. sapiens	Functional MTI
MIMAT0000436	hsa-miR-144-3p	ZEB2	H. sapiens	Functional MTI
MIMAT0000278	hsa-miR-221-3p	ZEB2	H. sapiens	Functional MTI
MIMAT0000451	hsa-miR-150-5p	ZNF350	H. sapiens	Functional MTI
MIMAT0000256	hsa-miR-181a-5p	ZNF763	H. sapiens	Functional MTI
